# Supplementary material
Source: PubMed Central journal article supplement (PMC4005793)
Supplement: NIHMS3943-supplement-1.pdf [file NIHMS3943-supplement-1.pdf]

**Supplementary Figure S2:** *HMGB1 mRNA and protein are highly expressed in undifferentiated C2C12 while their levels decrease in mature muscle fibers.*

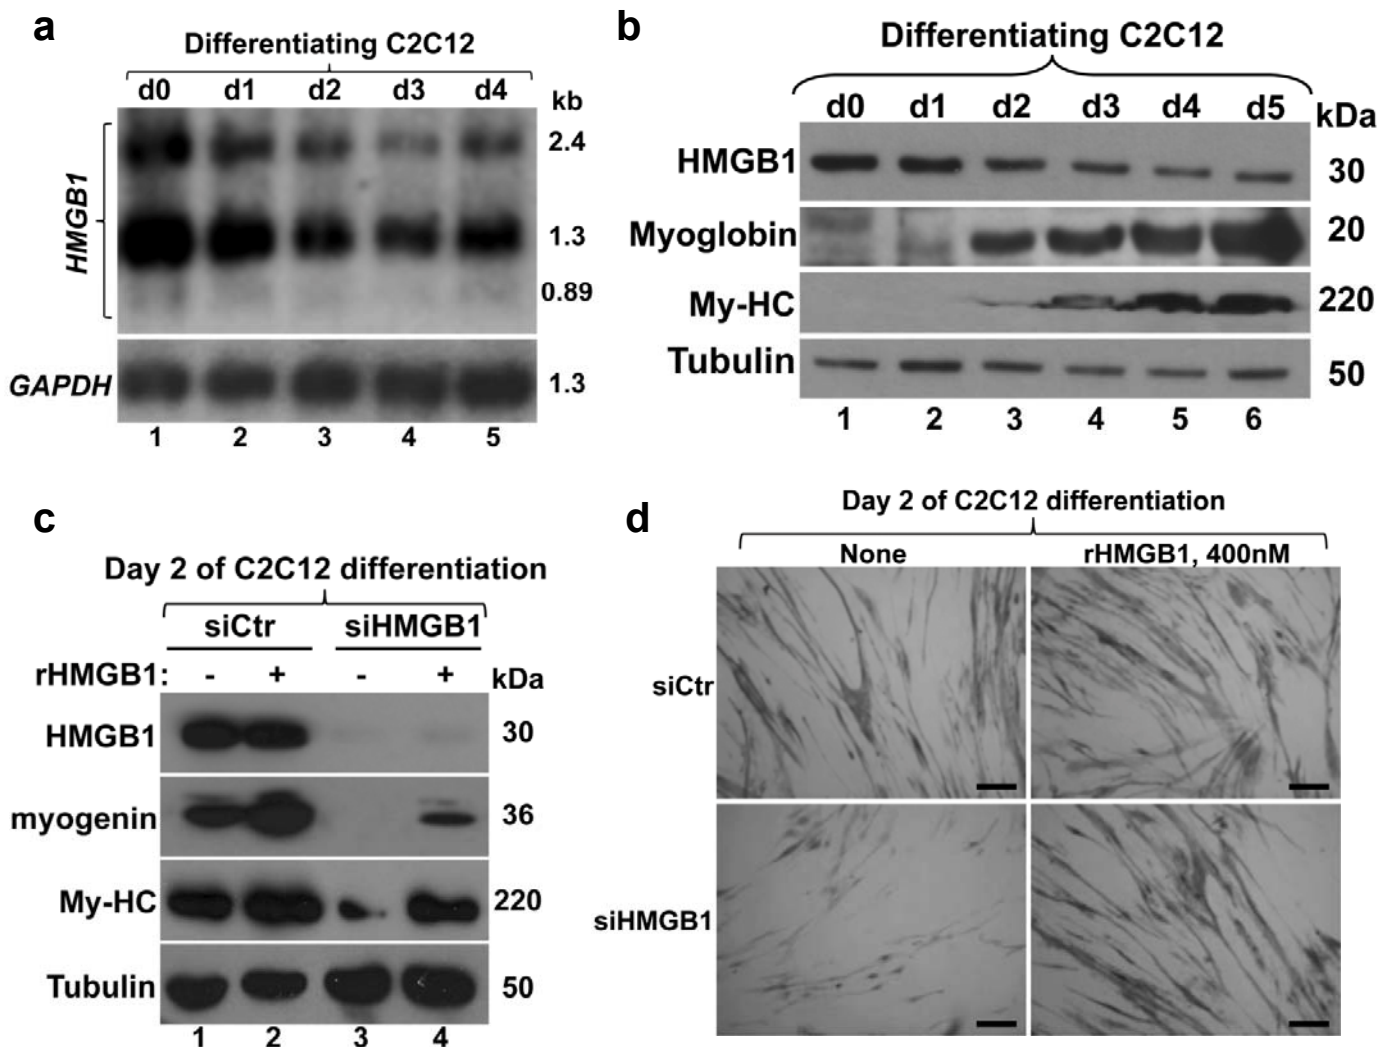

**(a)** Total RNA was isolated from confluent cells (d0) and during the differentiation process (d1 to d4). Northern blotting was performed using radiolabeled probes against *HMGB1* and *GAPDH* as a loading control. **(b)** Total cell extracts were prepared from differentiating C2C12 cells as indicated for a. Western blotting on these extracts was performed using a polyclonal antibody against HMGB1. Myoglobin and Myosin heavy chain (My-HC) were used to control differentiation progression and  $\alpha$ -tubulin as a loading control. Blots shown in a and b are representative of three independent experiments. **(c, d)** *Exogenous HMGB1 promotes myogenic differentiation in myoblasts knocked down for endogenous HMGB1.* C2C12 cells depleted of HMGB1 were induced for differentiation DM in the absence or presence of 400nM of recombinant HMGB1 (rHMGB1) protein. **(c)** Western blot analysis was performed using antibodies against HMGB1, myogenin and My-HC, and tubulin as a loading control. The blot is representative of three independent experiments. Note that silencing of HMGB1 results in reduced myogenin and My-HC expression; however, treatment of HMGB1-siRNA-treated myoblasts with rHMGB1 rescues their myogenic potential. **(d)** Immunohistochemistry analysis of cells treated as described in (c) using an anti-My-HC antibody. Representative images from three independent experiments are shown. Scale bars, 100  $\mu$ m.

**Supplementary Figure S3: The long half-life of HMGB1 mRNA is independent of HuR.**

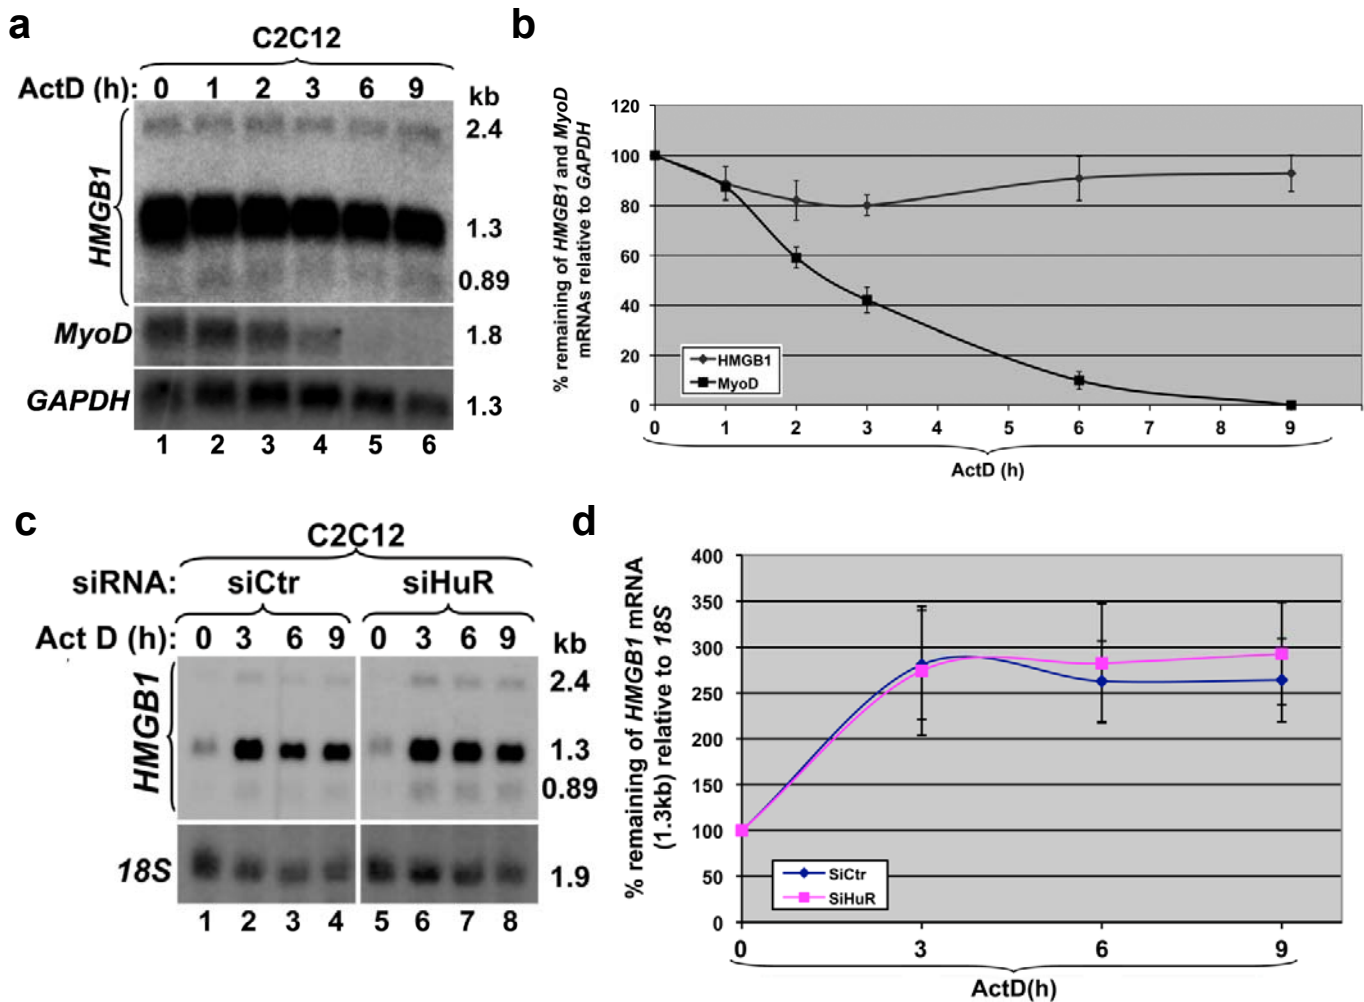

**(a)** Exponentially growing C2C12 cells were treated with ActD for 0, 1, 2, 3, 6 or 9 hours. The mRNAs of *HMGB1*, *MyoD* and *GAPDH* (loading control) were detected by northern blot. **(b)** The amount of *MyoD* message and the 1.3kb isoform of *HMGB1* mRNA were quantified using the ImageQuant software. mRNA stability was determined by normalizing the amount of *HMGB1* and *MyoD* mRNAs for each time point against the corresponding quantity of *GAPDH* mRNA. Each time point was then normalized against the abundance of mRNA at 0h of ActD treatment, which is considered 100%. These percentages were then plotted +/- S.E.M of three independent experiments. **(c, d)** The stability experiments and northern blotting (c) as well as the statistic analysis (d) were performed as described for (a-b) except that we used total RNAs prepared from siCtrl- and siHuR-treated C2C12 cells.

**Supplementary Figure S4: *HuR* is not involved in the cellular movement of *HMGB1* mRNA.**

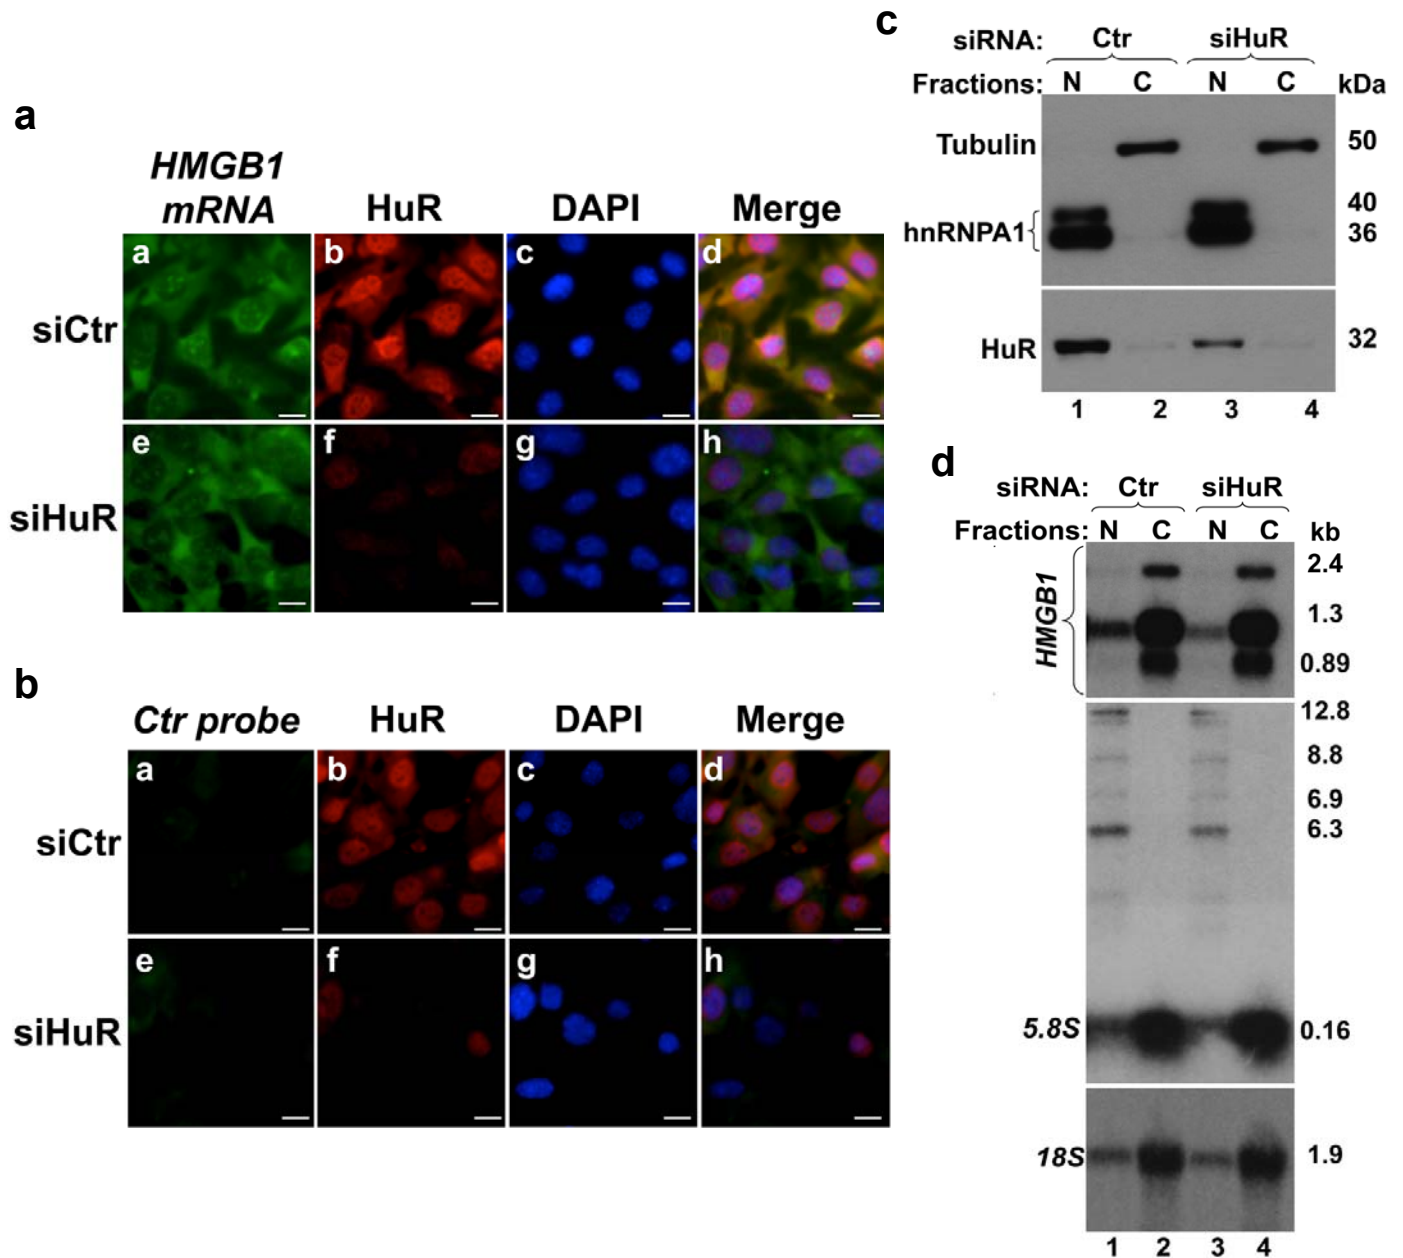

(a, b) C2C12 cells transfected with siHuR or siCtr were fixed, permeabilized, and incubated with digoxigenin-labeled *in vitro* transcribed antisense probe to detect *HMGB1* mRNA (a, panels a, e) and with sense RNA probe (b, panels a, e) as a control (*Ctrl probe*). Detection of HuR with anti-HuR antibody enabled the visualization of the knockdown of HuR in these cells. A single representative field for each cell treatment is shown. Scale bars, 20  $\mu$ m. (c) Exponentially growing C2C12 cells were transfected with siCtr or siHuR. 48 hours after transfection cells were fractionated into nuclear and cellular fraction that were used for western blotting. Membranes were probed with anti-HuR,  $\alpha$ -tubulin (as a control for cytoplasmic fractions) and hnRNP A1 (as a control for nuclear fractions) antibodies. (d) Total RNA prepared from the same fractions described in (c) were used for northern blotting. The membrane was probed with specific radiolabeled probes against *HMGB1*, 18S (as a loading control) and 5.8S (as a control for fractionation quality). All blots shown in c and d are representative of three independent experiments.

**Supplementary Figure S5: HuR binding site in the HMGB1-3'UTR.**

**a**

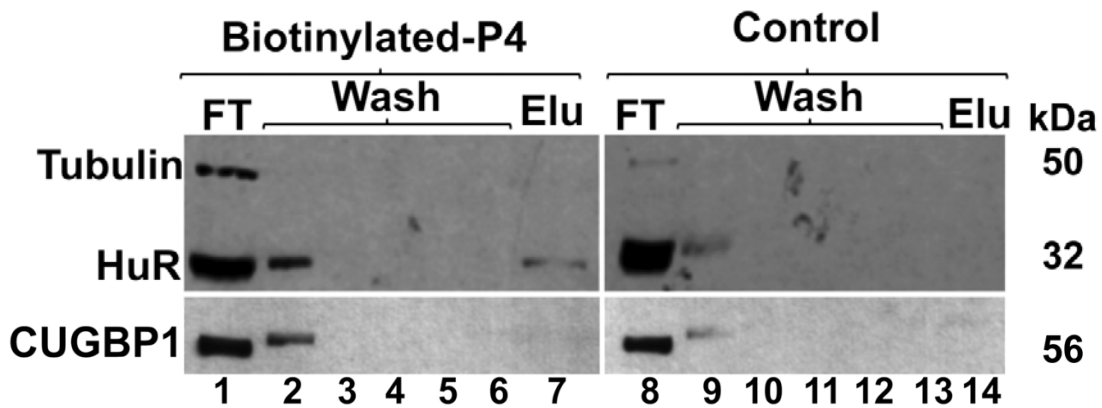

**b**

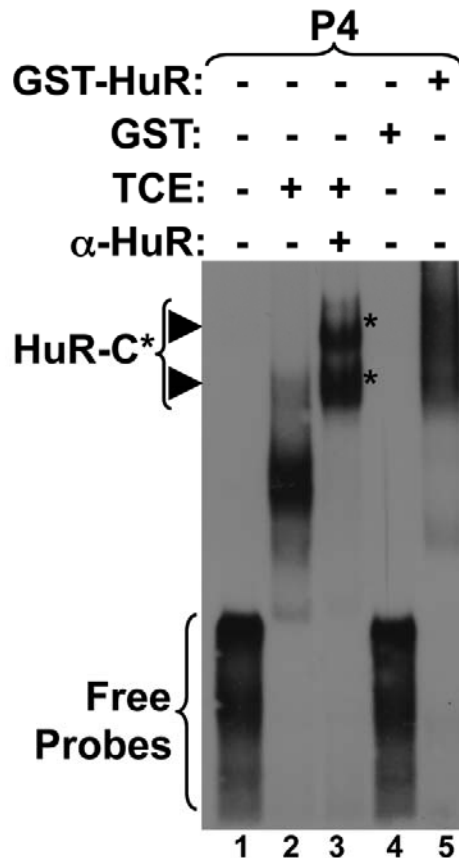

**(a)** Biotinylated P4 probe associates with HuR but not with CUGBP1. The P4 probe described in Figure 5a was biotinylated and used for a pull-down assay. Total extracts from C2C12 cells were incubated with Streptavidin beads coated or not with Biotinylated P4. Then, the beads were washed four times before elution with 1M NaCl. The four wash as well as the elution products were analysed by western blot using the anti-HuR, -CUGBP1 and  $\alpha$ -tubulin antibodies. **(b)** HuR directly associates with a U-rich element within HMGB1 3'UTR. Gel-shift binding assay was performed by incubating total cell extracts (TCE) prepared from C2C12 cells with the radiolabelled cRNA probe spanning the P4 region or by incubating 300 ng of purified GST or GST-HuR protein. This blot is a representation of three independent experiments.

**Supplementary Figure S6:** *miR-1192*, a novel miRNA that associates with HuR, is expressed in C2C12 cells and muscle tissues.

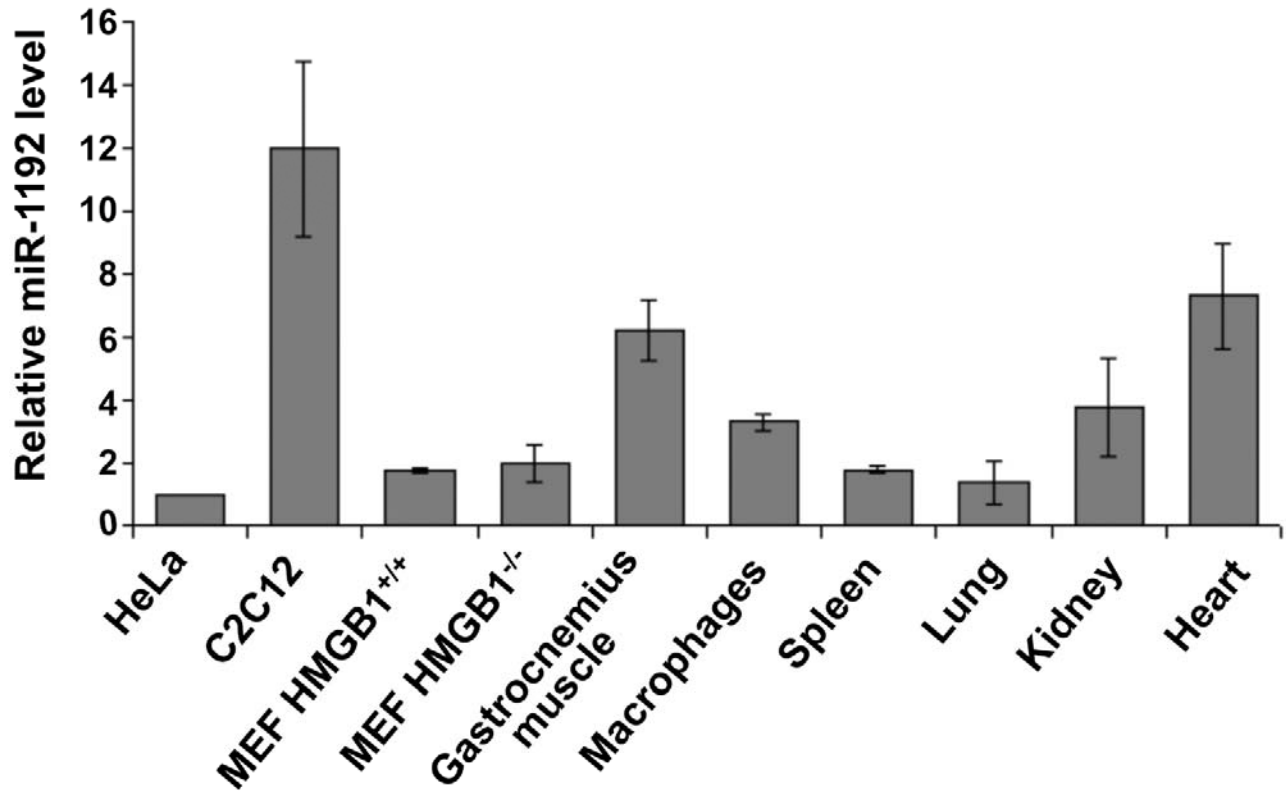

Total extracts from cells [HeLa, C2C12, macrophages and murine embryonic fibroblasts (MEFs) expressing or not HMGB1] or mice tissues (gastrocnemius muscle, spleen, lung, kidney and heart) were prepared and used for RT-qPCR to assess the expression levels of miR-1192. The level of the miR-1192 was determined relative to the level of the miR-16 in each sample and plotted as a relative percentage +/- the S.E.M. of three independent experiments.



**Supplementary Figure S8: Silencing miR-16 in C2C12 cells does not induce cell death nor affect the steady state level of HMGB1 mRNA.**

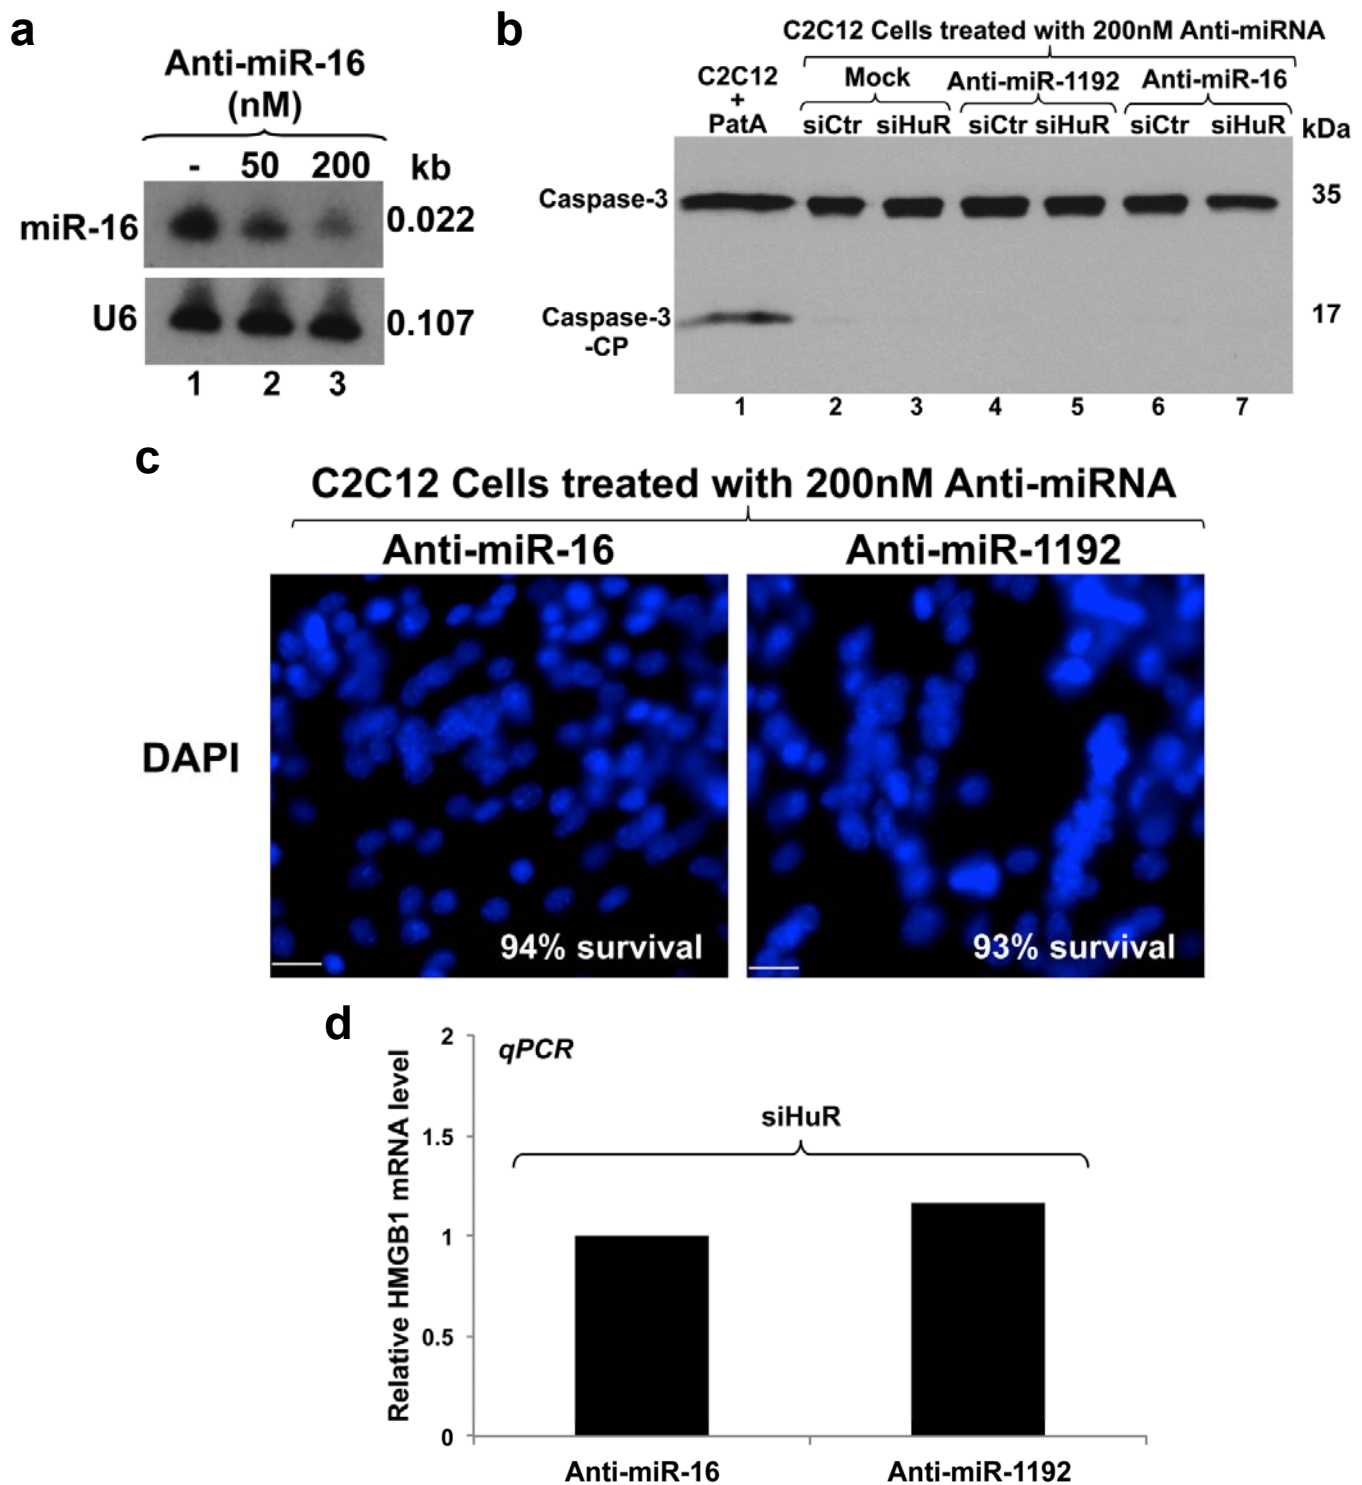

(a) 50 or 200 nM miR-16 antagomir (Anti-miR-16) were transfected in myoblasts. 48h later, RNA was extracted and northern blot was performed using Starfire-probe for miR-16 and a U6 probe as a control. This blot is a representation of two independent experiments. (b) Extracts from C2C12 treated with the translation inhibitor Pateamine A (PatA) (a known inhibitor of inducer of apoptosis<sup>64-66</sup>) as well as the same extracts described in Figure 8a, were used for western blot with anti-Caspase-3 antibody. (c) C2C12 cells treated with 200nM anti-miR-1192 or -16 and used for DAPI staining to assess cell viability. Scale bars, 20 $\mu$ m. (d) C2C12 depleted of endogenous HuR were treated as described in C. Total RNA was prepared and subjected to RT-qPCR analysis using specific primers for *HMGB1* and *GAPDH* mRNAs.





**Supplementary Figure S10:** *The expression of HuR and HMGB1 increases during muscle regeneration in vivo.*

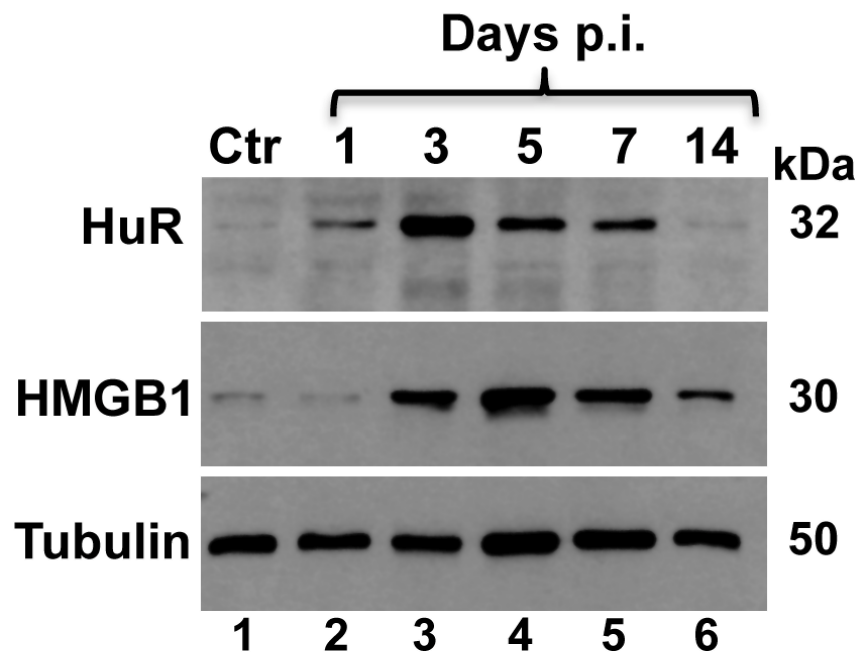

Western blot analysis of HuR and HMGB1 protein levels during muscle regeneration. GAPDH protein levels are included as a loading control.

**Supplementary Figure S11:** The expression profile of miR-1192 and miR-16 during myogenesis *in vitro* and muscle regeneration *in vivo*.

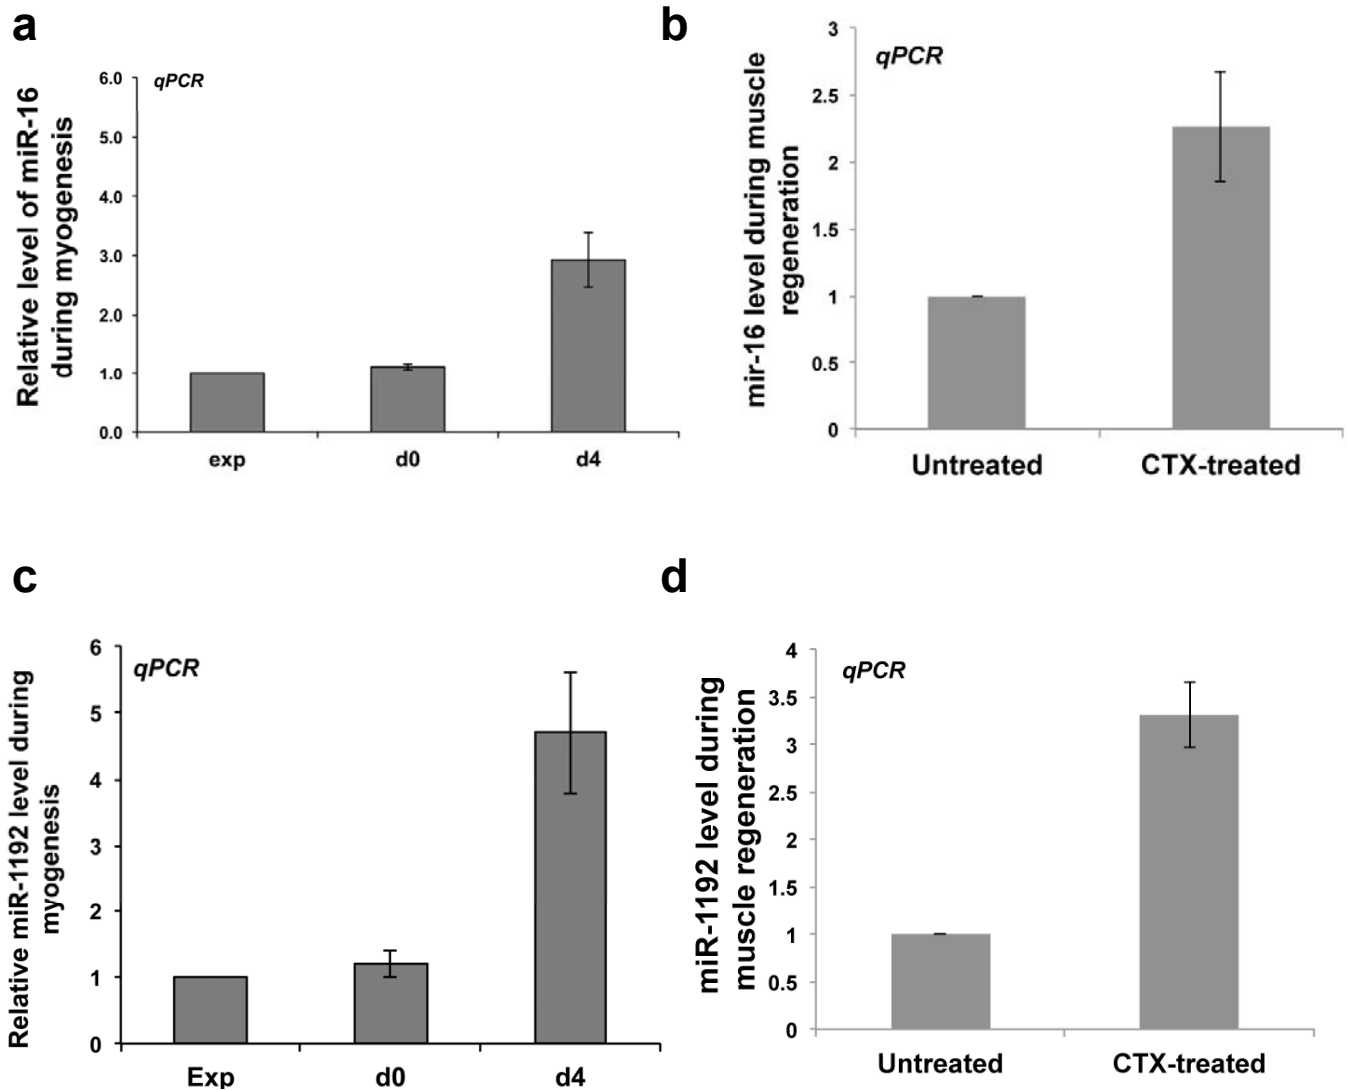

Total RNA extracts prepared from differentiating C2C12 cells (a and c) or from regenerating Tibialis muscle as described in Figure 3 (b and d) were subjected to RT-qPCR analysis using specific primers for miR-16 or miR-1192 as described in Supplementary Figure S6. Error bars represent S.E.M. from two independent experiments (a and c) and three Tibialis muscles (b and d).

**Supplementary Figure S12**: Scans of the blots shown in the main and Supplementary Figures .

Each panel is shown in a separate page. The full panel as shown in Figures or Supplementary Figures is presented at the top, followed by the full blot of each sub-panel. A legend is also provided at the bottom of each page.

# Supplementary Figure S12a

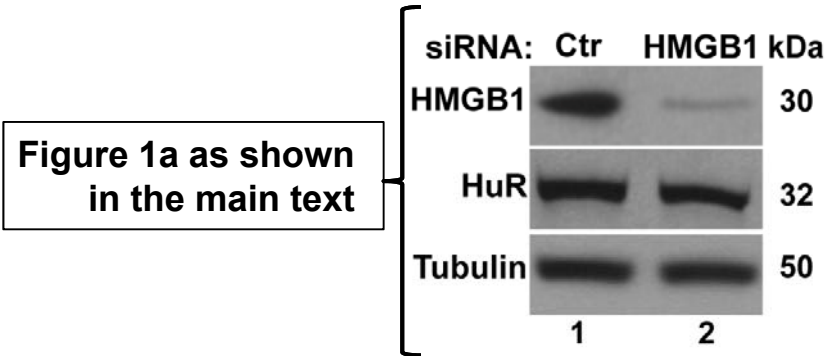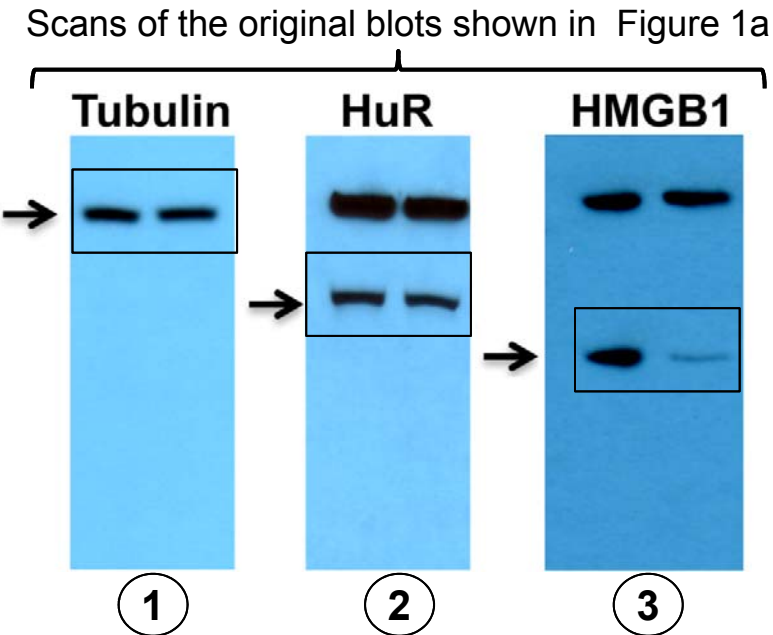

Scans 1 and 2 represent the same blot that was first probed with an anti-Tubulin antibody (1) then with with anti-HuR antibody (2). Since HMGB1 and HuR have a very close molecular weight (30 and 32 respectively) the same samples were run on a separate gel (3) and probed with both anti-Tubulin and anti-HMGB1 antibodies. The boxes highlight the area of each blot used to mount Figure 1a.

# Supplementary Figure S12b

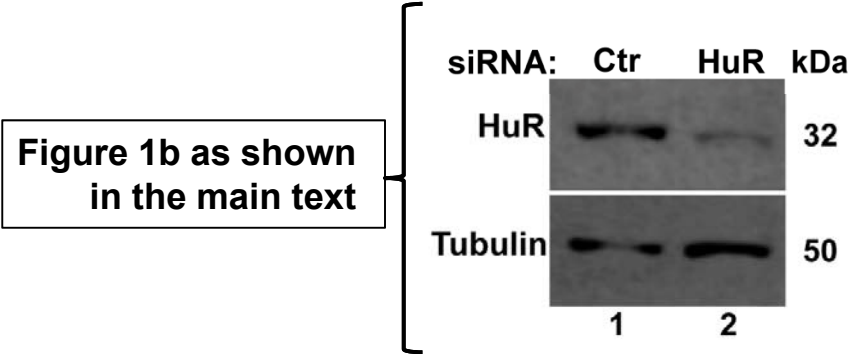

Scans of the original blots shown in Figure 1b

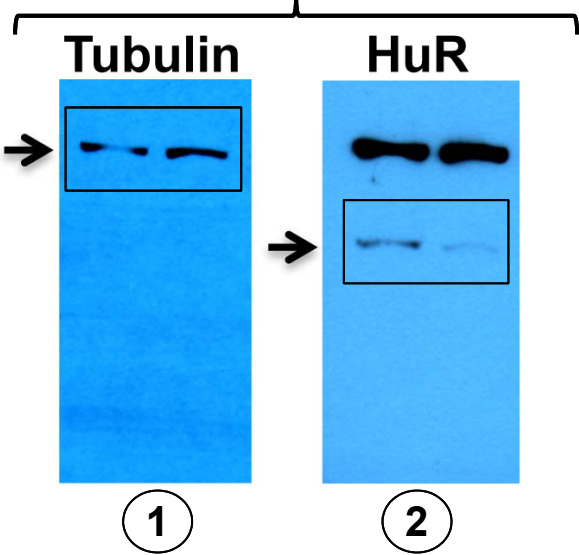

Scans 1 and 2 represent the same blot that was first probed with anti-Tubulin (1) then with anti-HuR (2) antibodies. The boxes highlight the area of each blot used to mount Figure 1b.

**Supplementary Figure S12c**

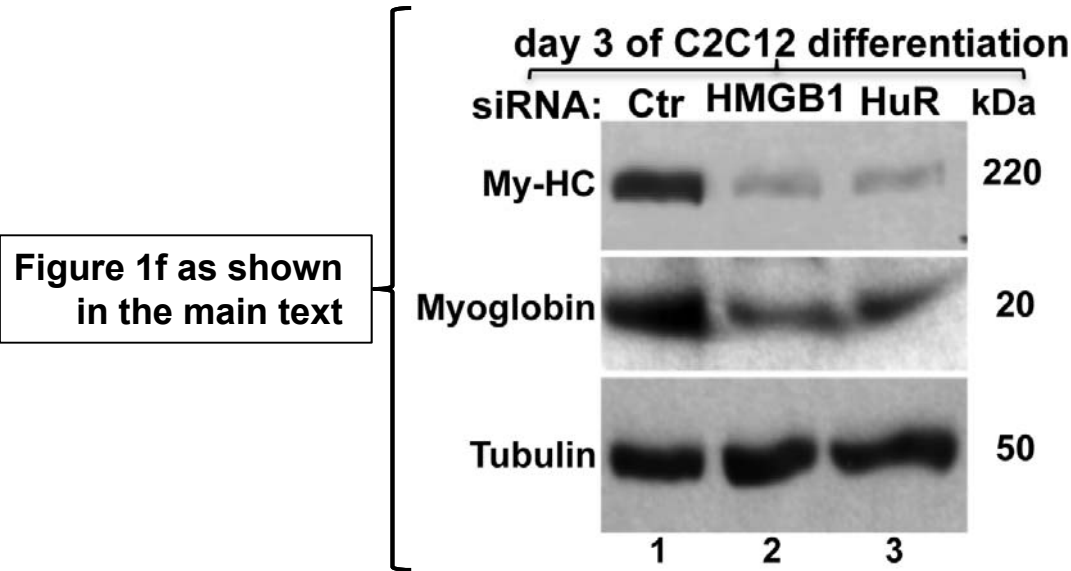

Scans of the original blots shown in Figure 1f

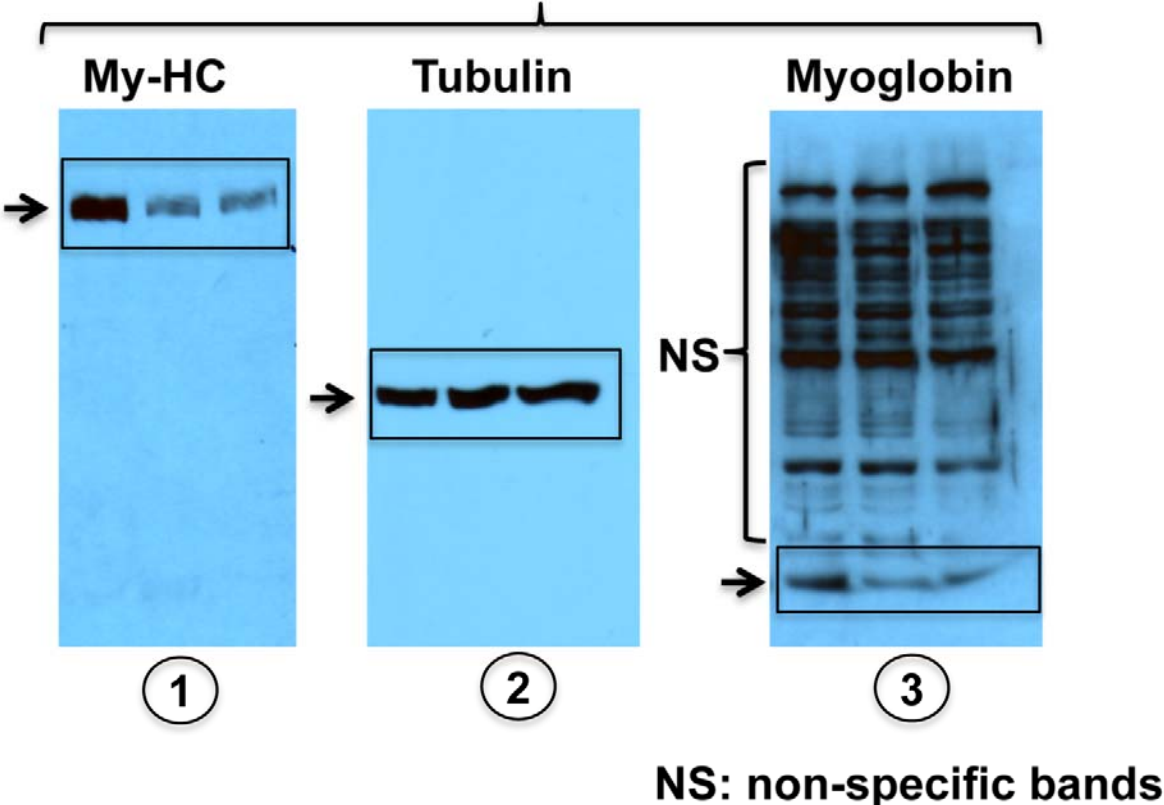

Scans 2 and 3 represent the same blot that was first probed with anti-Myoglobin (3) then (after being stripped) with an anti-Tubulin (2) antibodies. Since the molecular weight of Myosin heavy chain (My-HC) is very high (220kDa) the same extracts were run on a separate gel (1) and probed with the anti-Myosin Heavy chain anti-body. Of note the anti-Myoglobin antibody also detects several non-specific bands (NS). The boxes highlight the area of each blot used to mount Figure 1f.

## Supplementary Figure S12d1

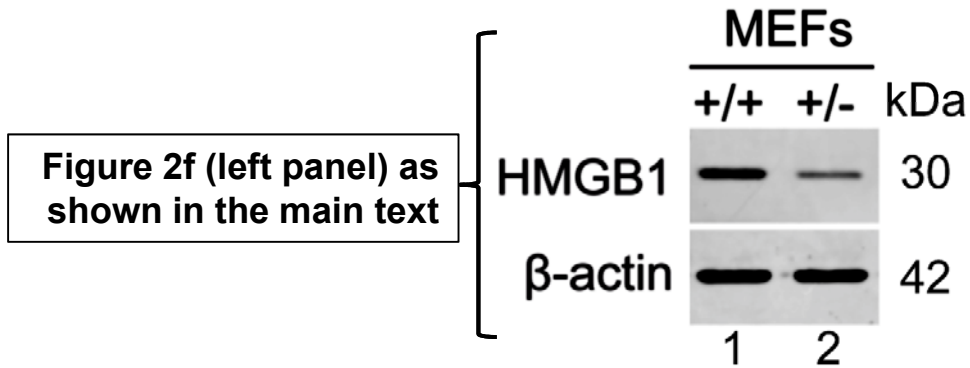

Scans of the original blots shown in Figure 2f (left panel)

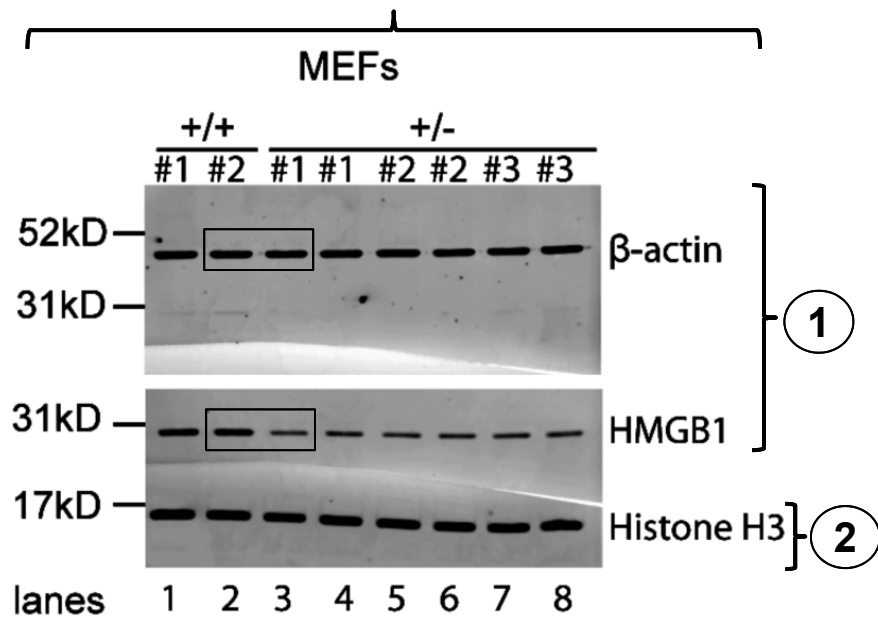

The original membrane was cut into two parts (1 and 2) and respectively probed with anti-HMGB1, anti-β-actin antibodies (part 1) and anti-Histone H3 antibody (part 2). H3 was used as another control but is not shown in the main Figure 2f. The boxes highlight the area of each blot that was used to mount Figure 2f (left panel).



## Supplementary Figure S12d2

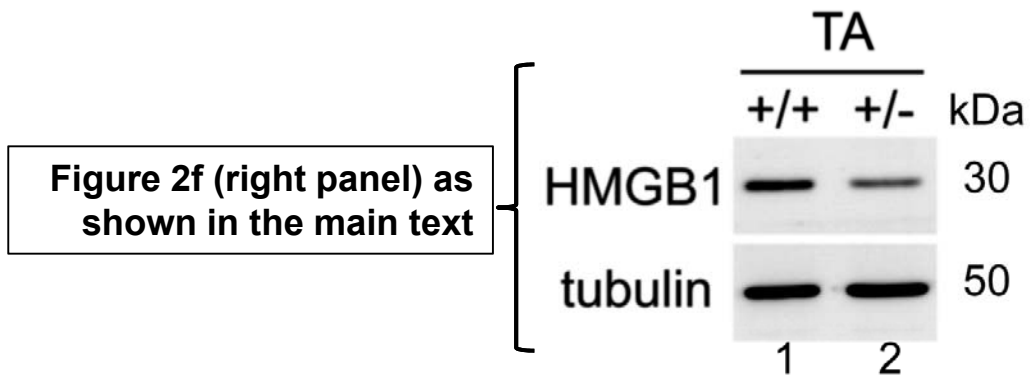

Scans of the original blots shown in Figure 2f (right panel)

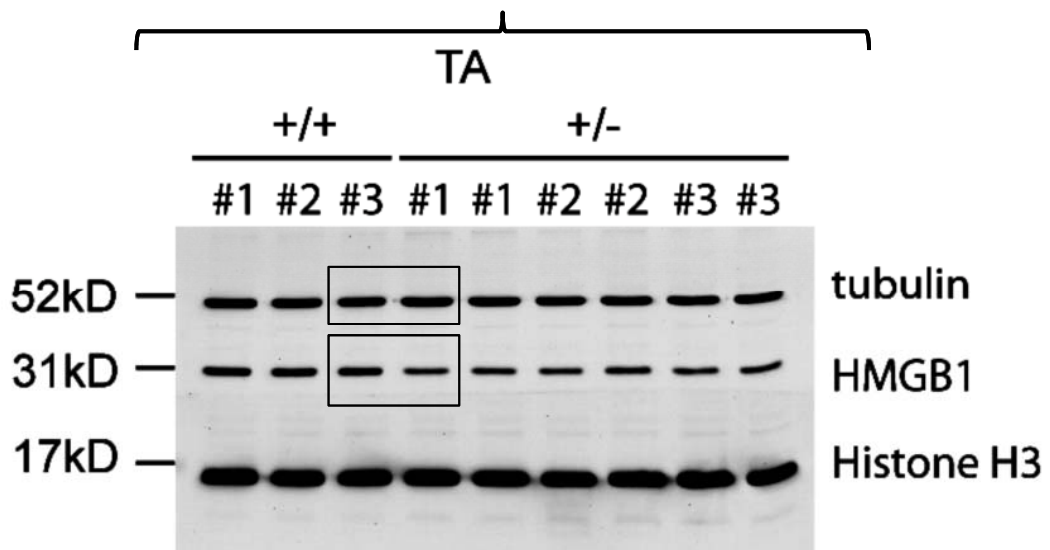

Here the blot was simultaneously probed with anti-HMGB1, -Tubulin and -Histone H3 antibodies. H3 was used as another control but is not shown in the main Figure 2f (right panel). The boxes highlight the area of the blot that were used to mount Figure 2f (right panel).

## Supplementary Figure S12e

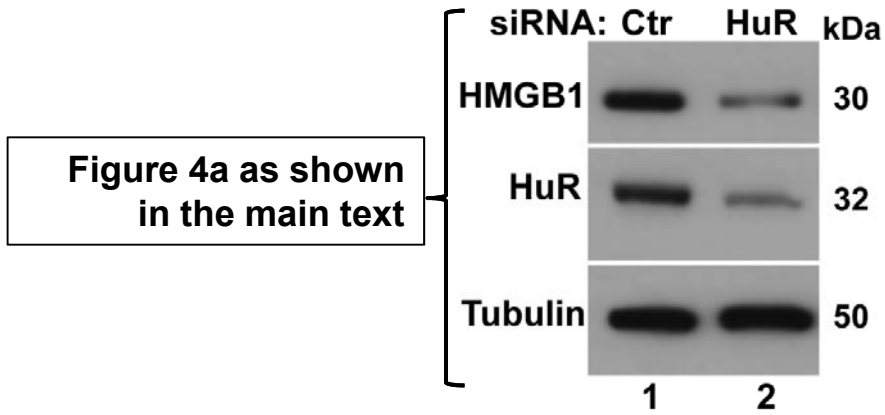

Scans of the original blots shown in Figure 4a

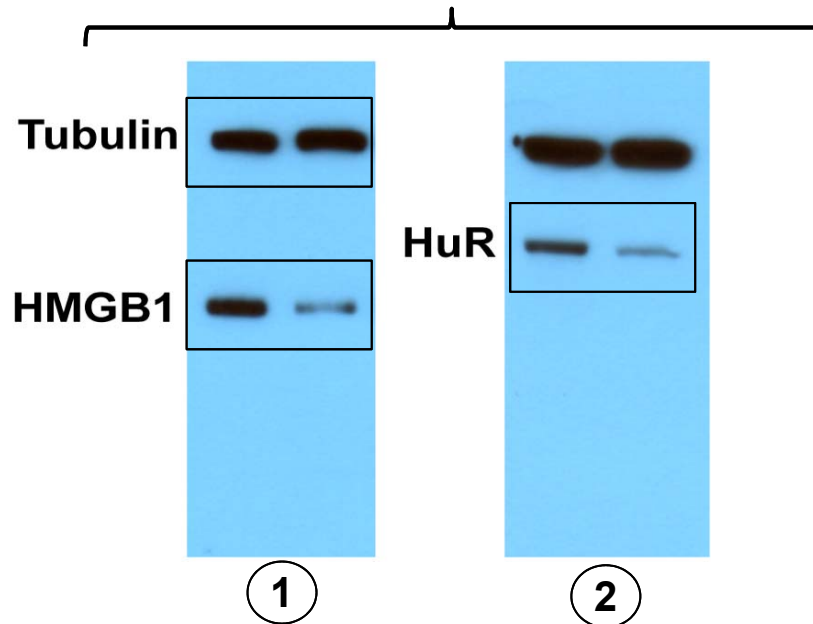

Since HMGB1 and HuR have very close molecular weight (30 and 32 respectively) the same samples were run on two separate gels and the blots are indicated as (1) and (2). Blot (1) was probed with both anti-Tubulin and anti-HMGB1 antibodies, while blot (2) was probed with both anti-Tubulin and anti-HuR antibodies. The boxes highlight the area of each blot used to mount Figure 4a.

## Supplementary Figure S12f

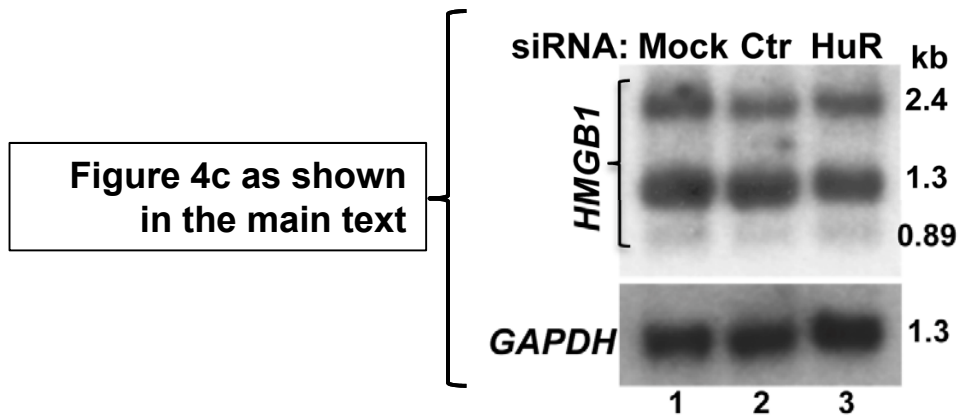

Scans of the original blots shown in Figure 4c

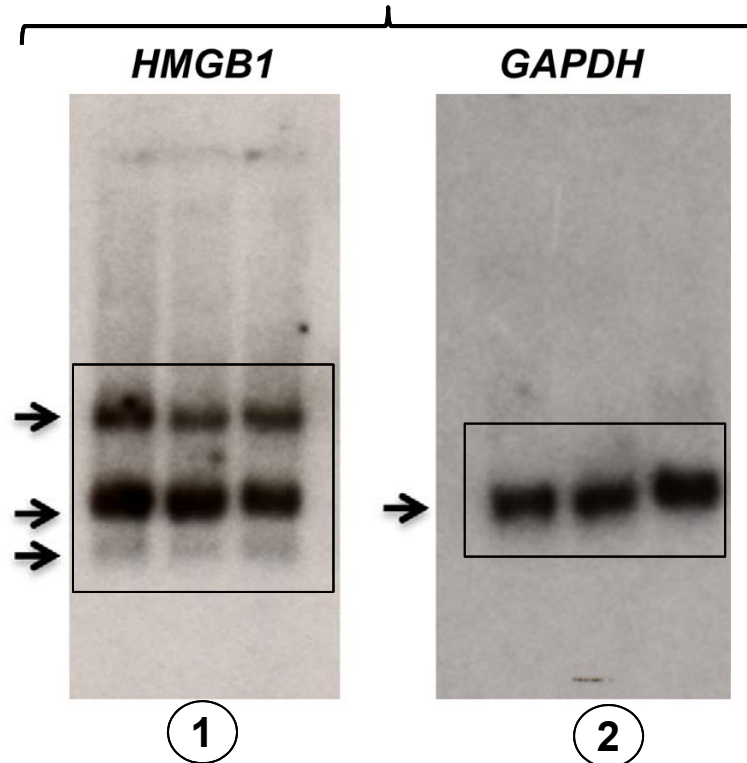

The same membrane was probed first with a specific anti-sense probe specific for *HMGB1* mRNA, then with an anti-sense probe specific for *GAPDH*. The boxes highlight the area of the blots that were used to mount Figure 4c.

## Supplementary Figure S12g

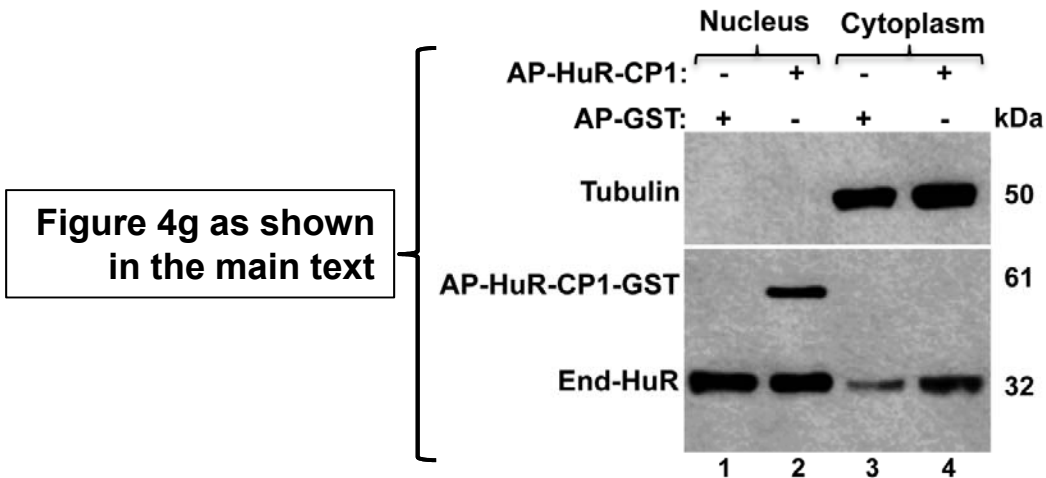

Scans of the original blots shown in Figure 4g

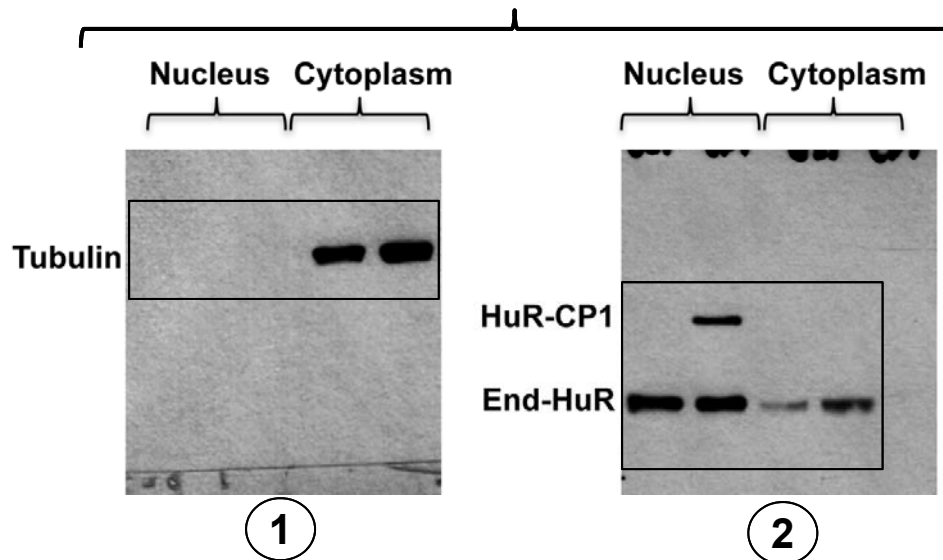

Scans 1 and 2 represent two gels that were run using the same samples. Blot (1) was probed with an anti-Tubulin antibody. Blot (2) was probed with anti-HuR antibody (2). The boxes highlight the area of each blot used to mount Figure 4g.

## Supplementary Figure S12h

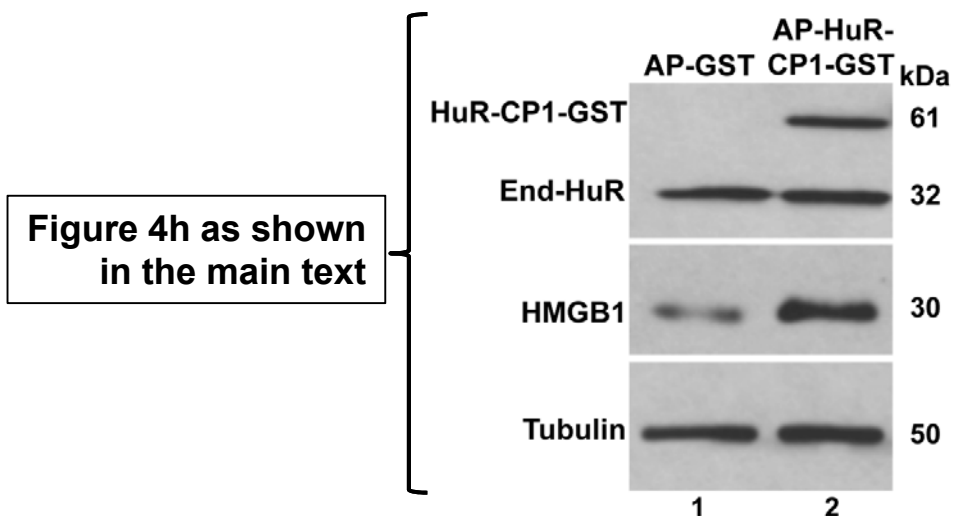

Scans of the original blots shown in Figure 4h

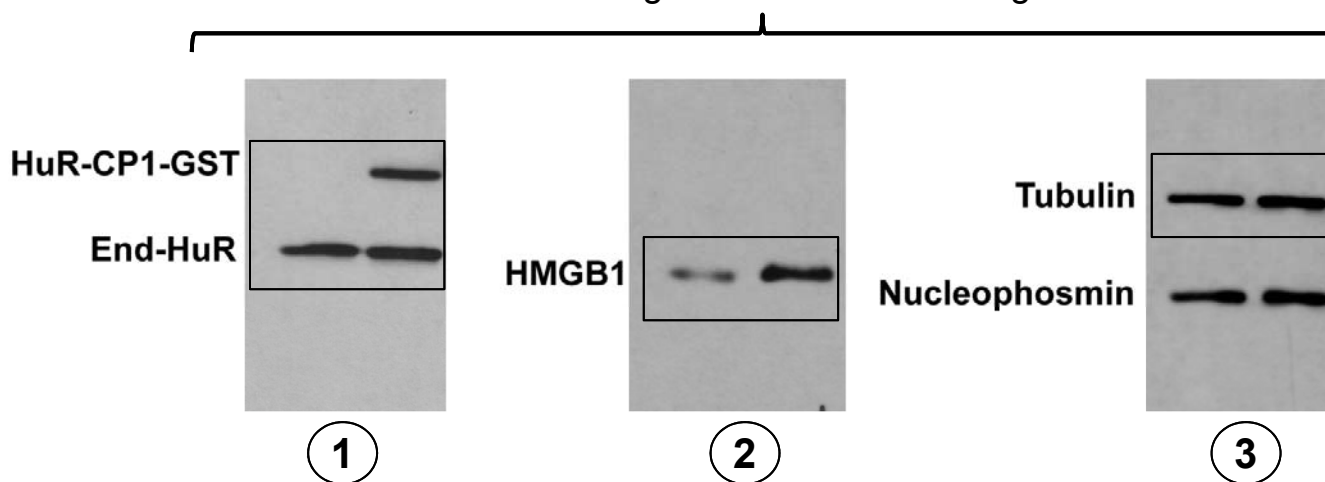

Scans 1, 2 and 3 represent three different gels that were run using the same samples. Blot (1) was probed with an anti-HuR antibody. Blot (2) was probed with an anti-HMGB1 antibody. Blot (3) was probed with both anti-Tubulin and Nucleophosmin antibodies (3). Nucleophosmin was used as another control, but was not included in Figure 4h. The boxes highlight the area of each blot used to mount Figure 4h.

## Supplementary Figure S12i

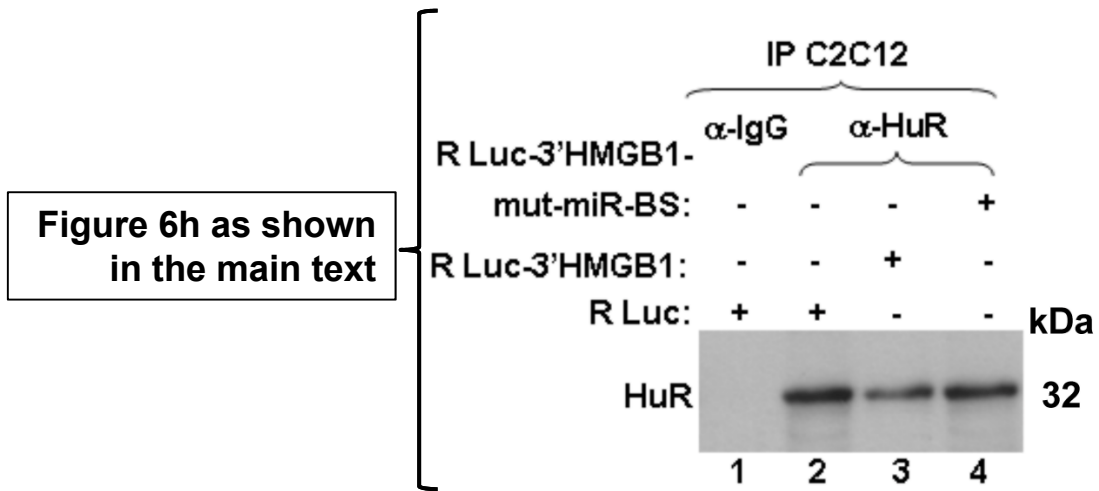

Scans of the original blots shown in Figure 6h

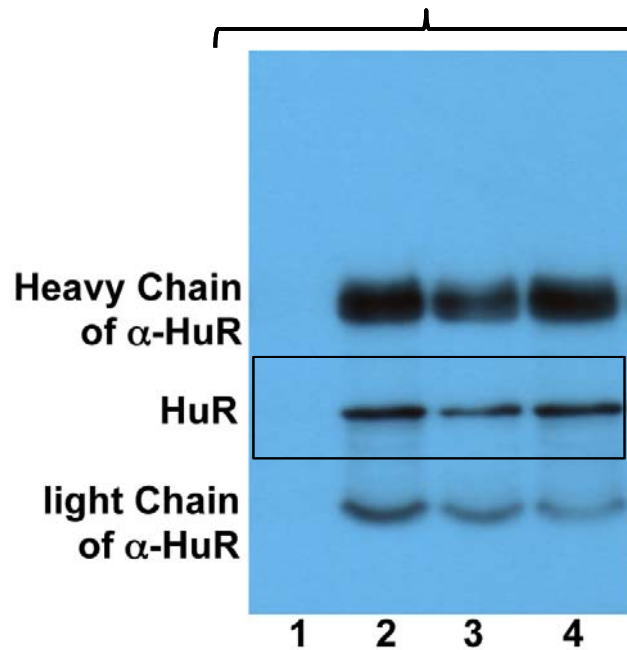

The scan shown represents the original blot that was probed with anti-HuR antibody. Due to cross-reactivity between the anti-HuR antibody (3A2) and the secondary antibody used in the western blot, the heavy and light chains of the 3A2 antibody were also revealed. The boxes highlight the area of each blot used to mount Figure 6h.

# Supplementary Figure S12k

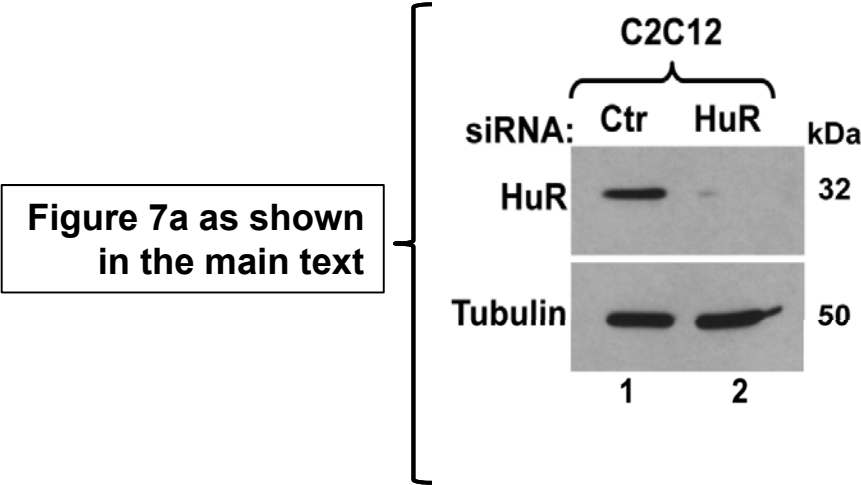

Scans of the original blots shown in Figure 7a

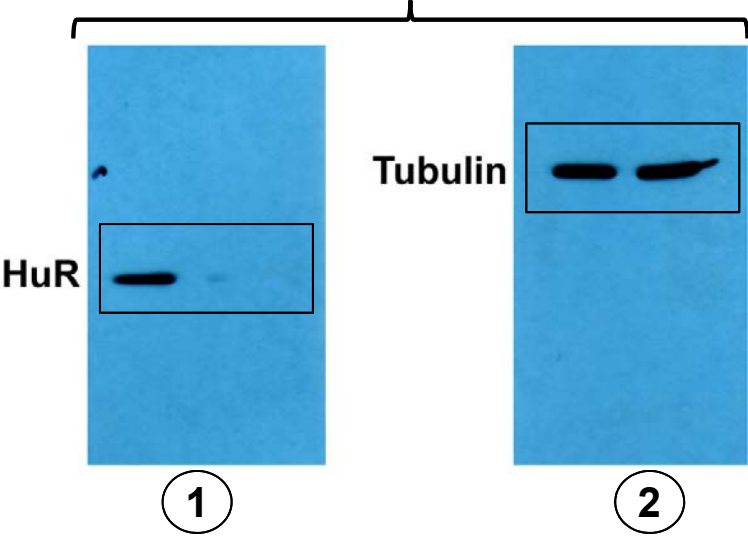

Scans 1 and 2 represent the same blot that was first probed with anti-HuR antibody (1) then with anti-Tubulin antibody (2). The boxes highlight the area of each blot used to mount Figure 7a.

**Supplementary Figure S12I**

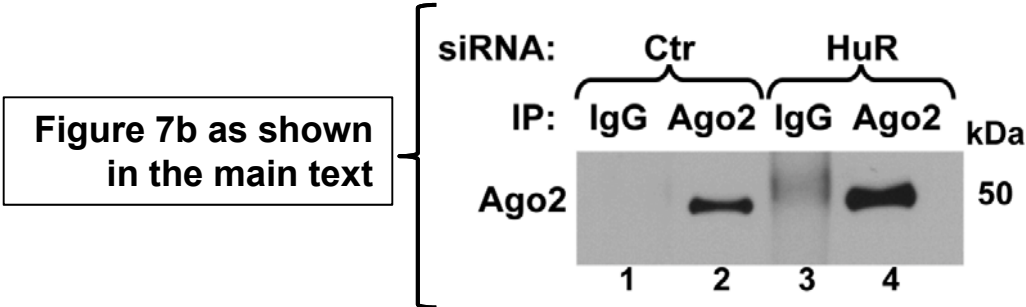

Scan of the original blot shown in Figure 7b

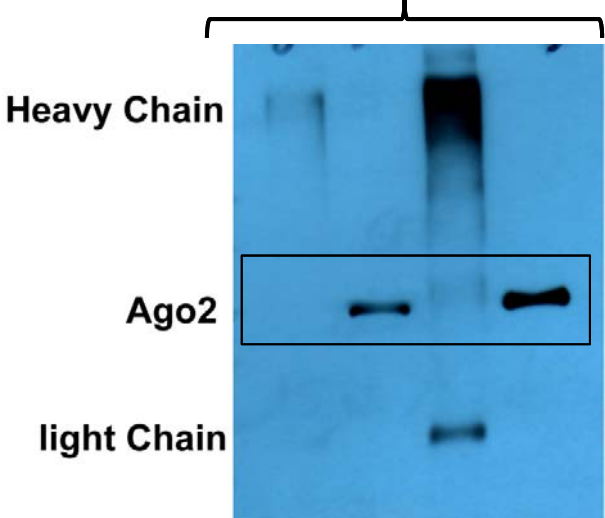

The scan shown represents the original blot that was probed with anti-Ago2 antibody. Due to cross-reactivity between the anti-Ago2 antibody and the secondary antibody used in the western blot, the heavy and light chains of the anti-Ago2 antibody were also revealed. The box highlight the area of the blot used to mount Figure 7b.



## Supplementary Figure S12m

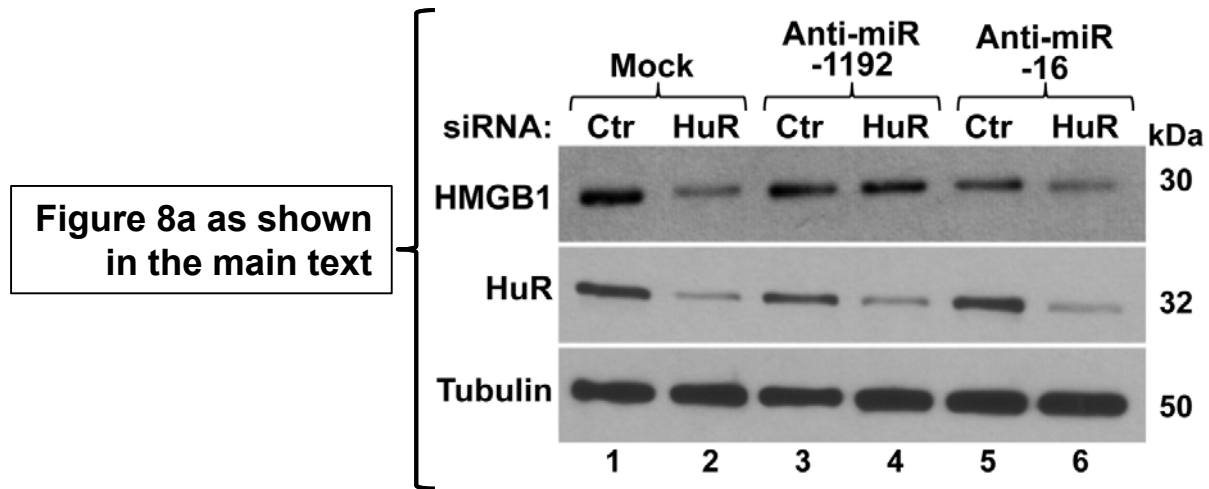

Scans of the original blots shown in Figure 8a

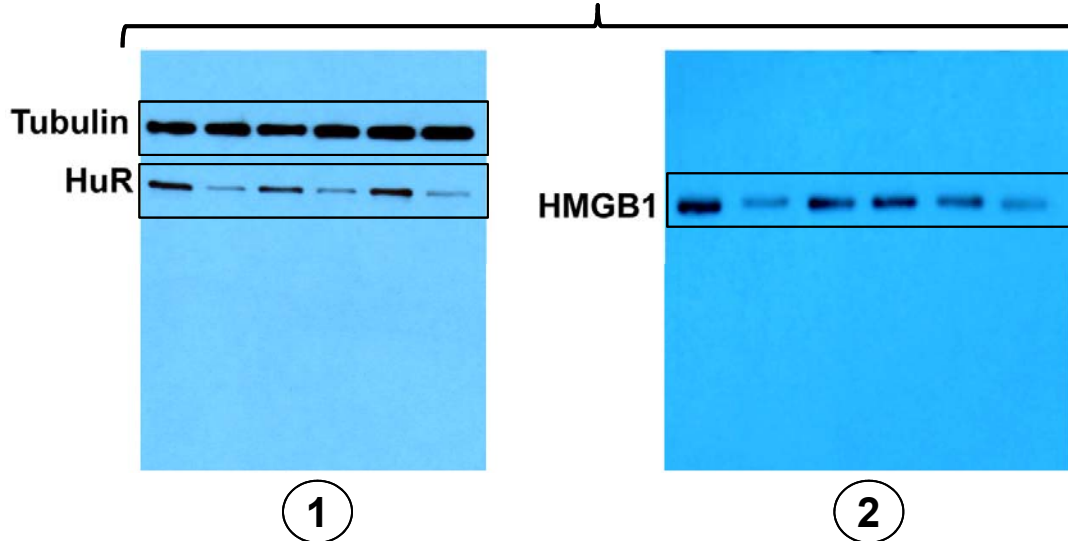

Since HMGB1 and HuR have very close molecular weights (30 and 32 respectively) the same samples were run on two separate gels (1 and 2). Blot (1) was probed with both anti-HuR and anti-Tubulin antibodies. Blot (2) was probed with anti-HMGB1 antibody (2). The boxes highlight the area of each blot used to mount Figure 8a.

# Supplementary Figure S12n

Figure 8e as shown in the main text

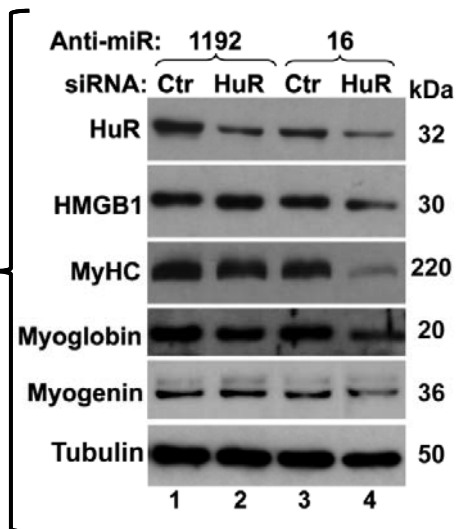

Scans of the original blots shown in Figure 8e

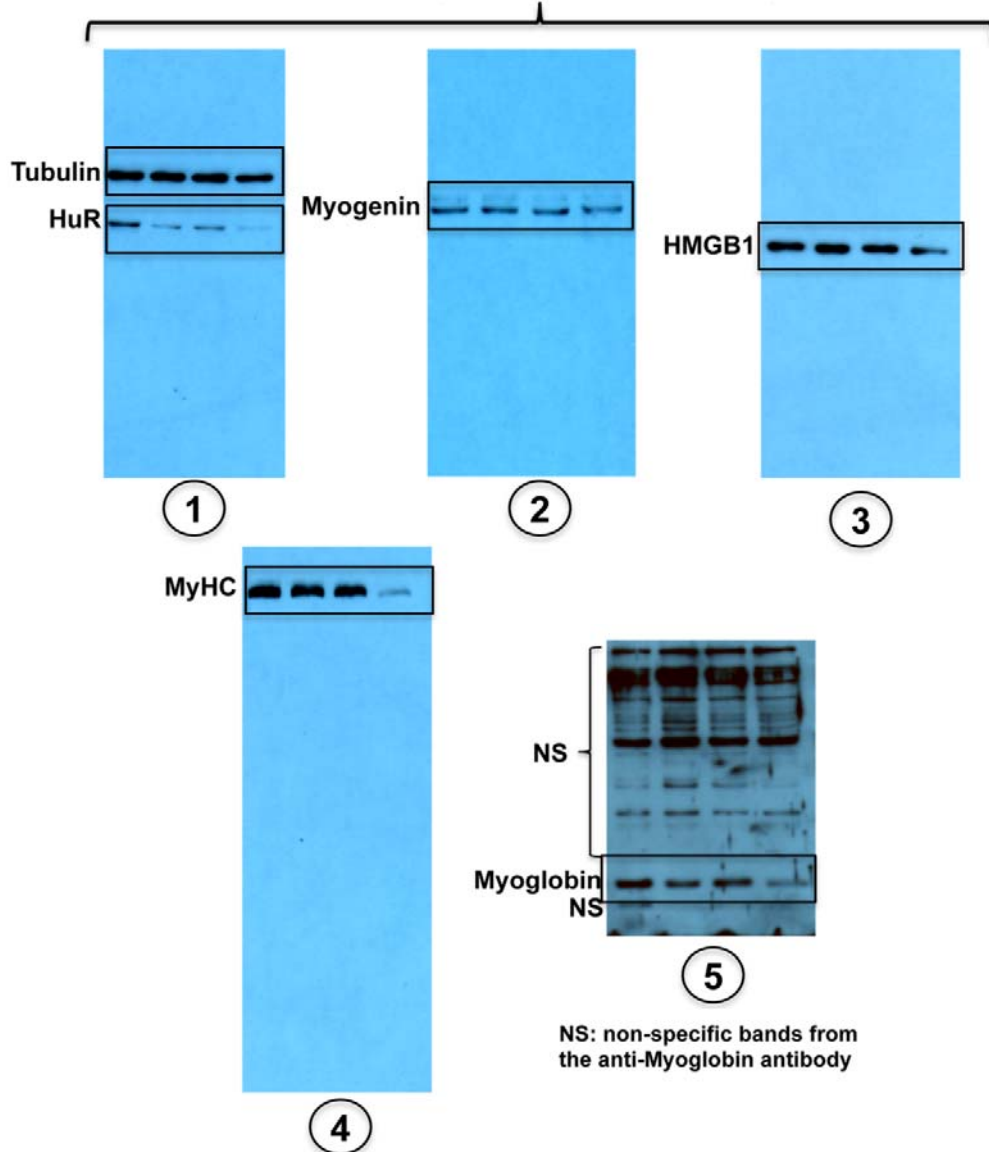

The scans represent different gels that were run using the same samples from the same experiment. Scan (1) represents the blot that was probed with both anti-HuR and anti-Tubulin antibodies. Scans, (2), (3), (4) and (5) represent blots that were respectively probed with an anti-Myogenin (2), anti-HMGB1 (3), anti-Myosin Heavy Chain (4) and anti-Myoglobin (5) antibodies. NS in blot (5) indicates non-specific bands detected by the anti-Myoglobin antibody. The boxes highlight the area of each blot used to mount Figure 8e.

## Supplementary Figure S12o

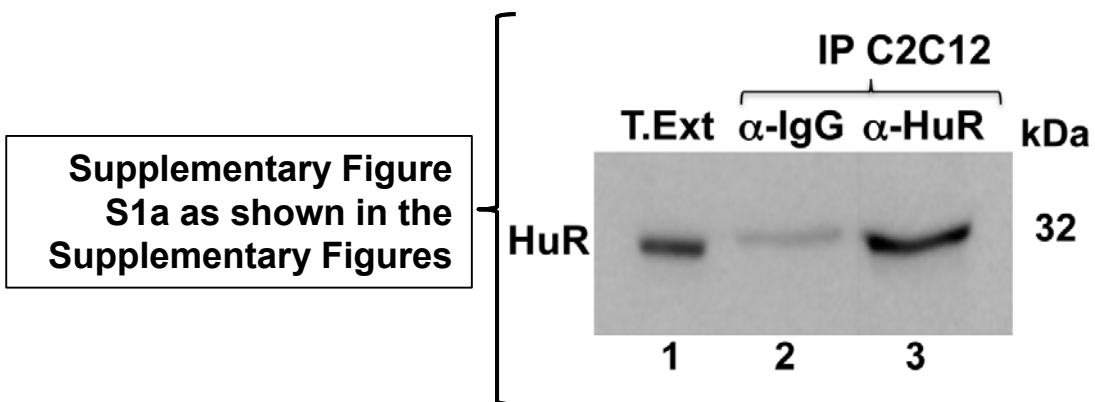

Scan of the original blot shown in Supplementary Figure S1a

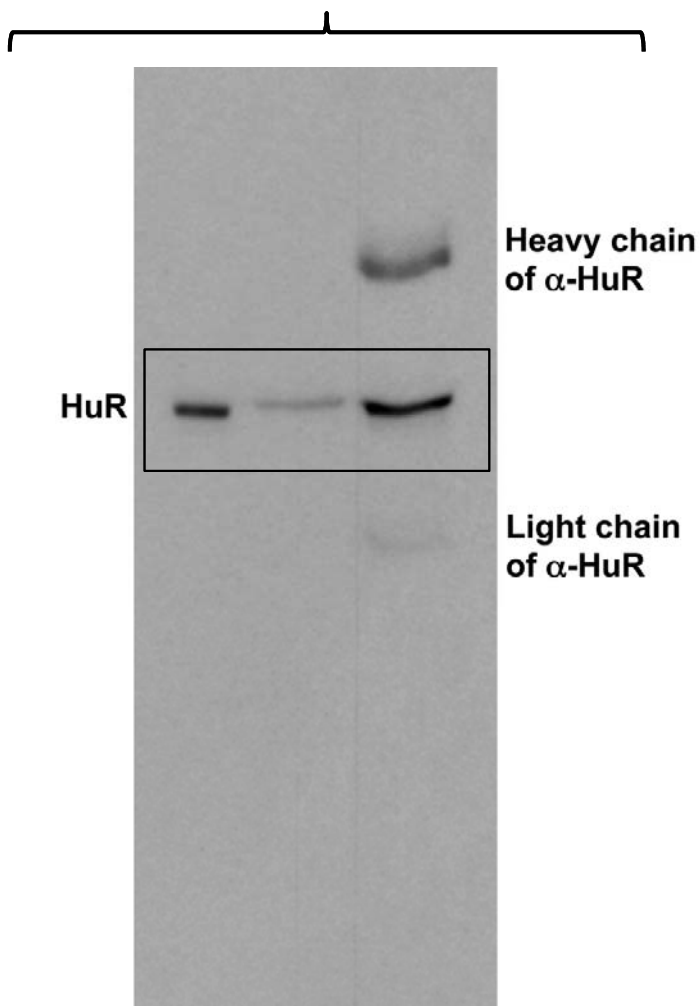

The scan shown represents the original blot that was probed with anti-HuR antibody. Due to cross-reactivity between the anti-HuR antibody (3A2) and the secondary antibody used in the western blot, the heavy and light chains of the 3A2 antibody were also revealed. The box highlights the area of each blot used to mount Supplementary Figure S1a.

## Supplementary Figure S12p

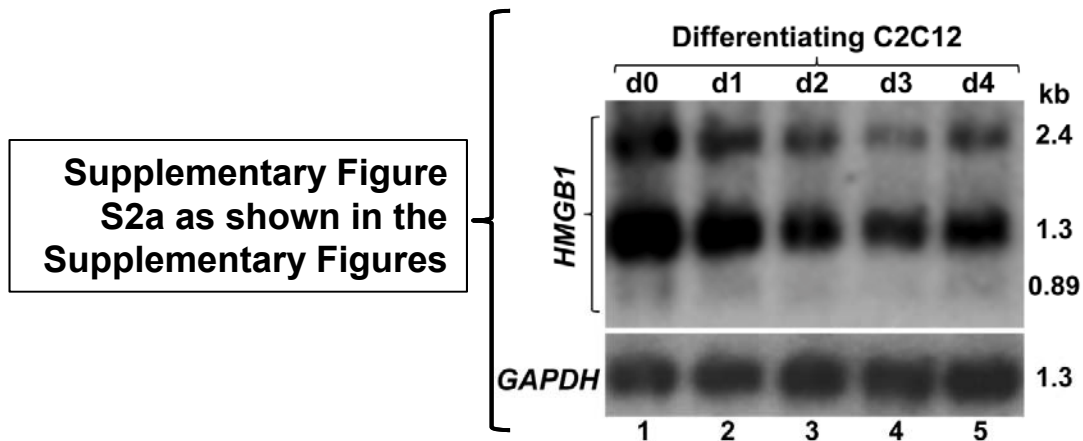

Scans of the original blots shown in Supplementary Figure S2a

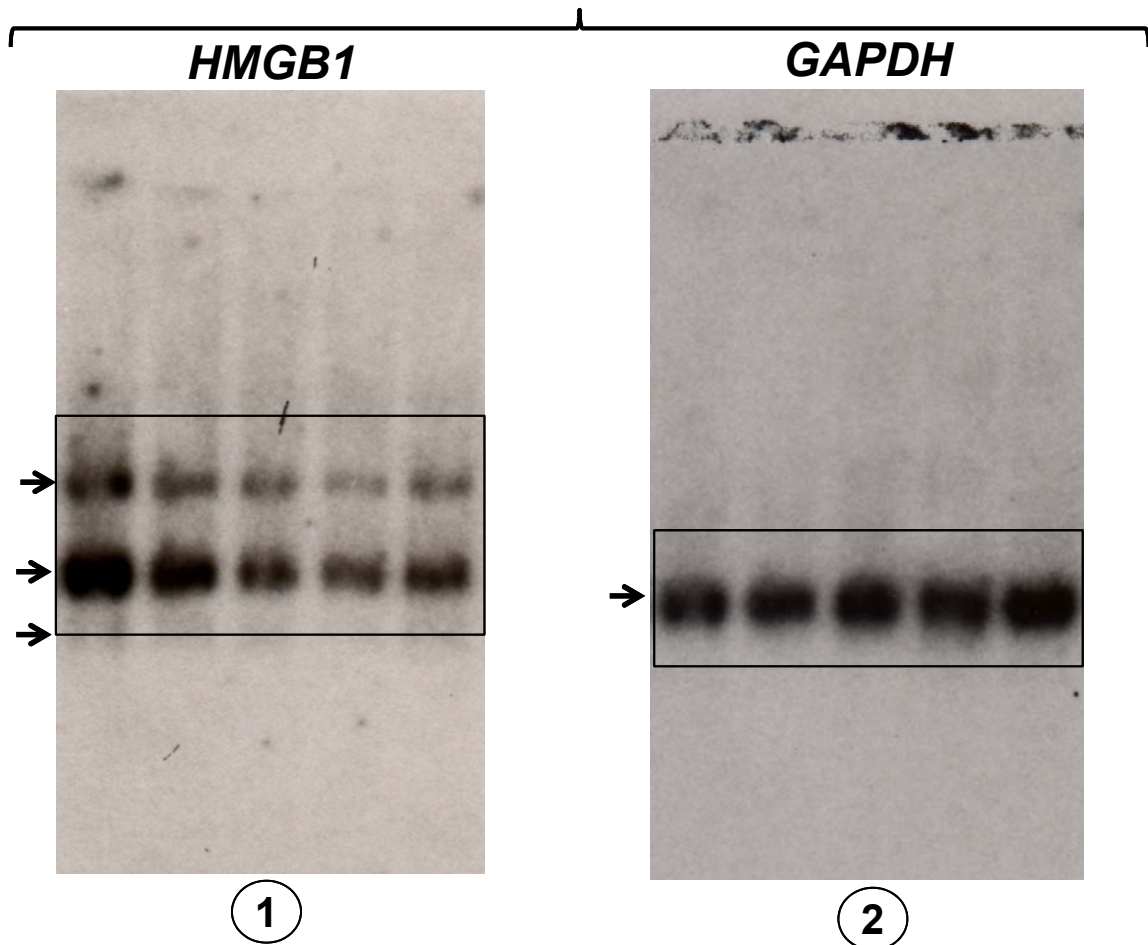

The same membrane was probed first with a specific anti-sense probe specific for *HMGB1* mRNA (1), then the membrane was stripped and probed with an anti-sense probe specific for *GAPDH* (2). The boxes highlight the area of the blots that were used to mount Supplementary Figure S2a.

## Supplementary Figure S12q

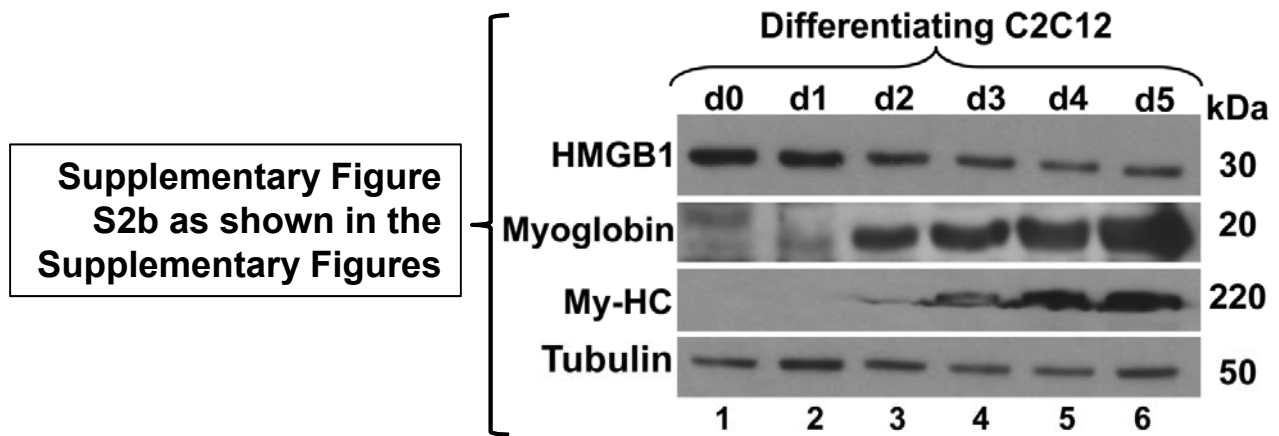

Scans of the original blots shown in Supplementary Figure S2b

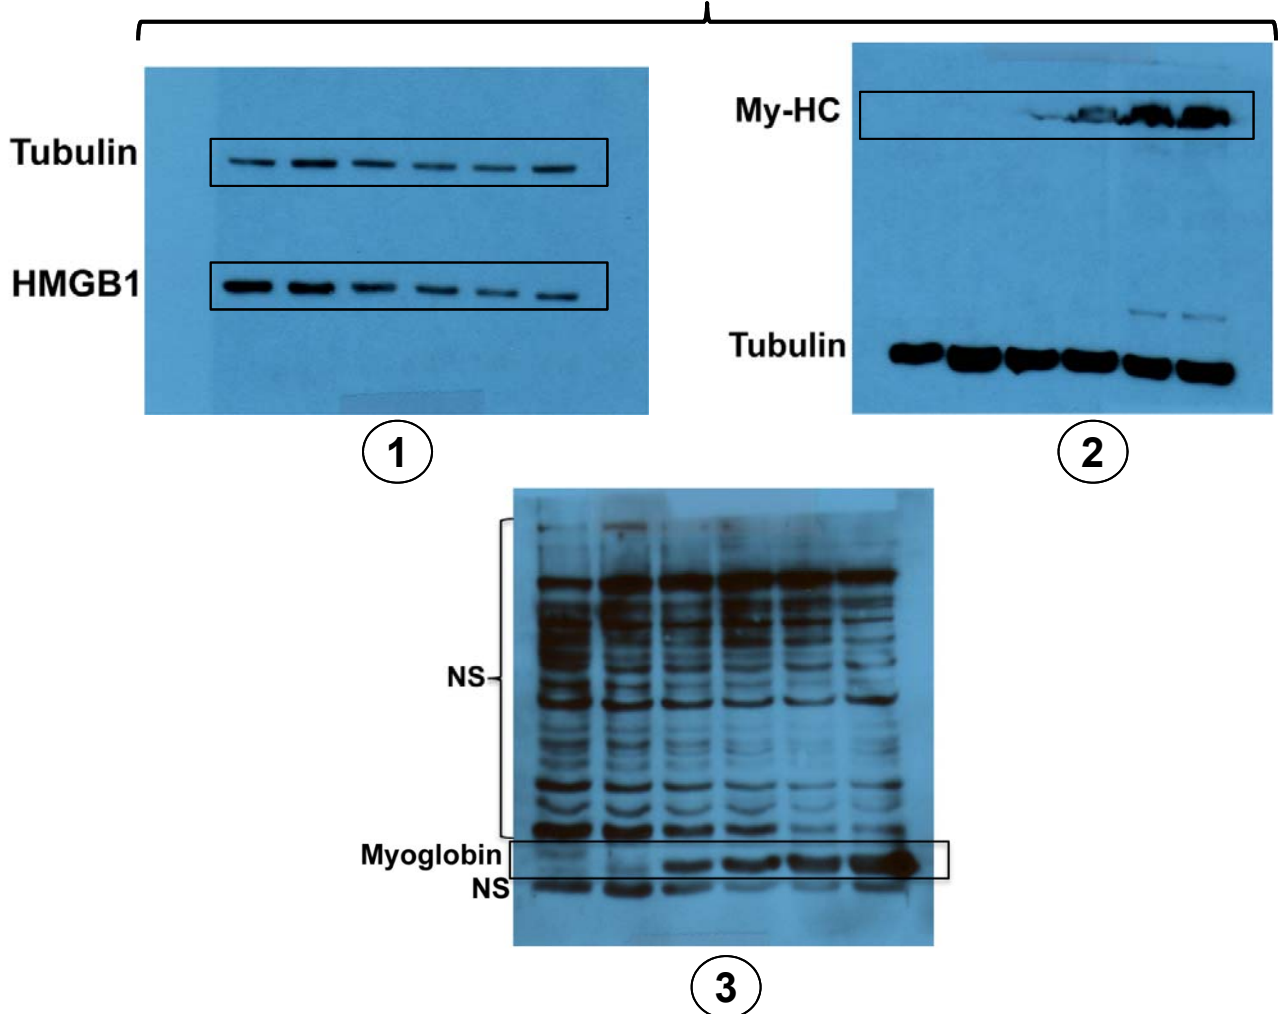

The three scans shown represent three different gels that were run using the same samples from the same experiment. Scan (1) represents a blot that was probed with both anti-HMGB1 and anti-Tubulin antibodies. Scan (2) represents a blot that was probed with both the anti-Tubulin and anti-Myosin Heavy Chain. Scan (3) represents a blot that was probed with the anti-Myoglobin antibody. NS in blot (3) indicates non-specific bands detected by the anti-Myoglobin antibody. The boxes highlight the area of each blot used to mount Supplementary Figure S2b.

# Supplementary Figure S12r

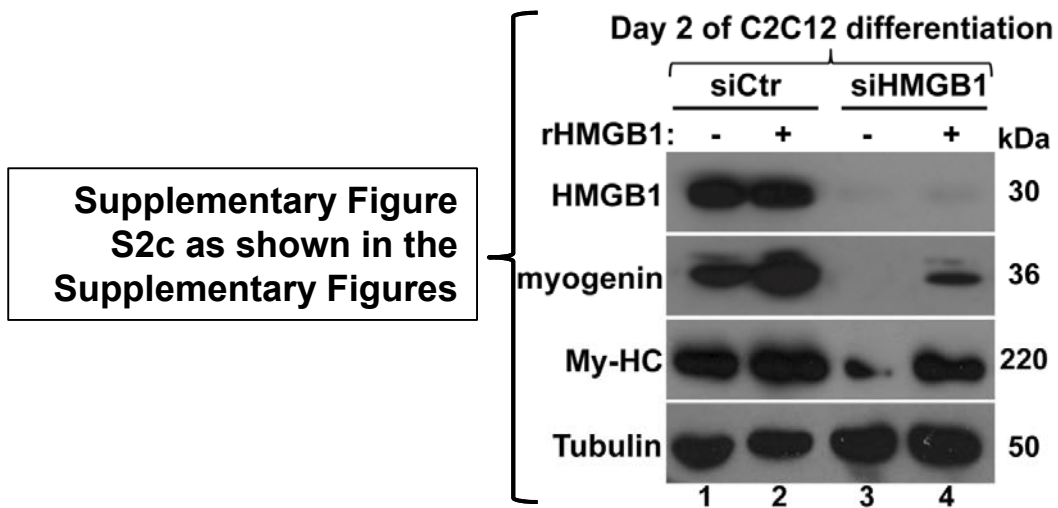

Scans of the original blots shown in Supplementary Figure S2c

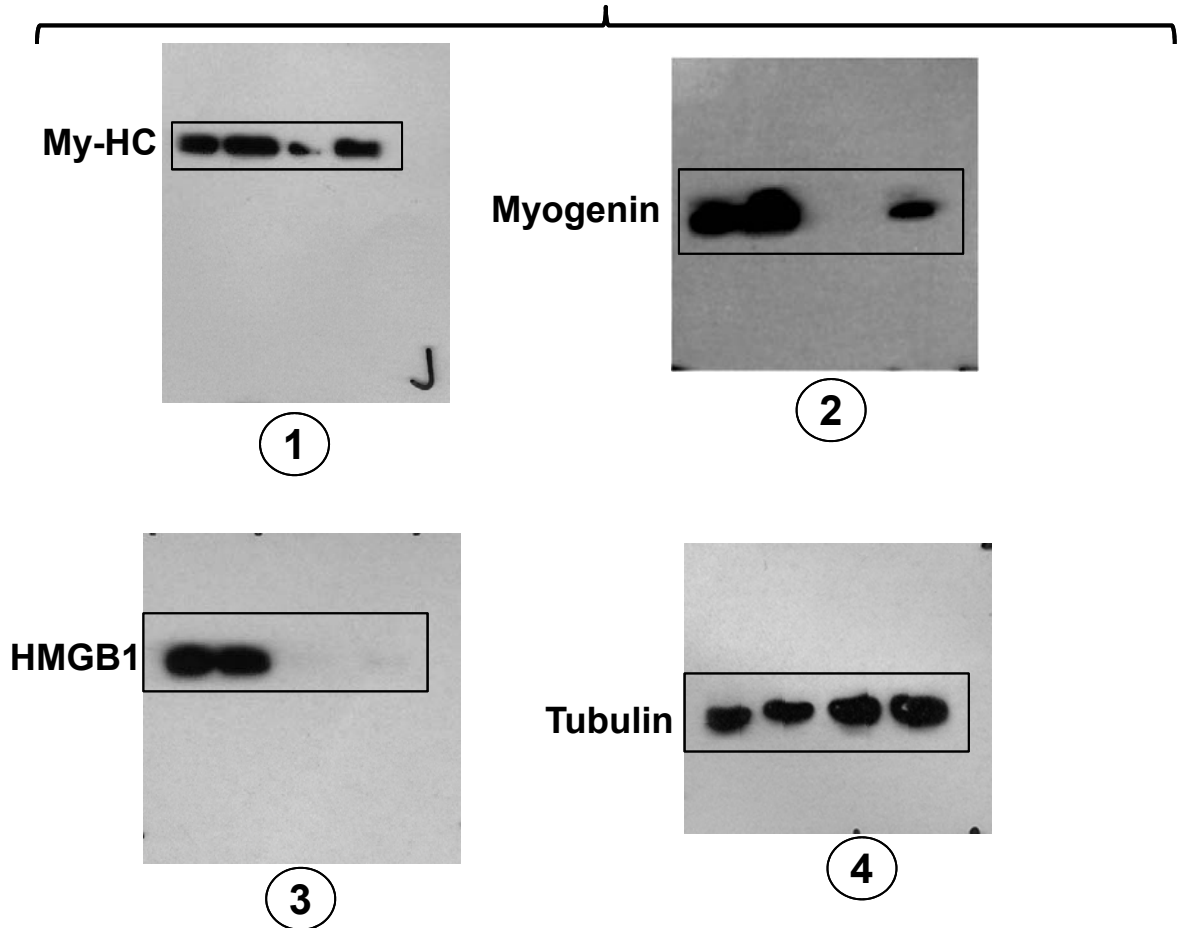

The four scans shown represent three different gels that were run using the same samples from the same experiments. Scan (1) represents the blot that was probed with the anti-Myosin heavy chain antibody. Scans (2), (3) and (4) respectively represent blots that were probed with anti-Myogenin (2), anti-HMGB1 (3) and with anti-Tubulin (4) antibodies. The boxes highlight the area of each blot used to mount Supplementary Figure S2b.

## Supplementary Figure S12s

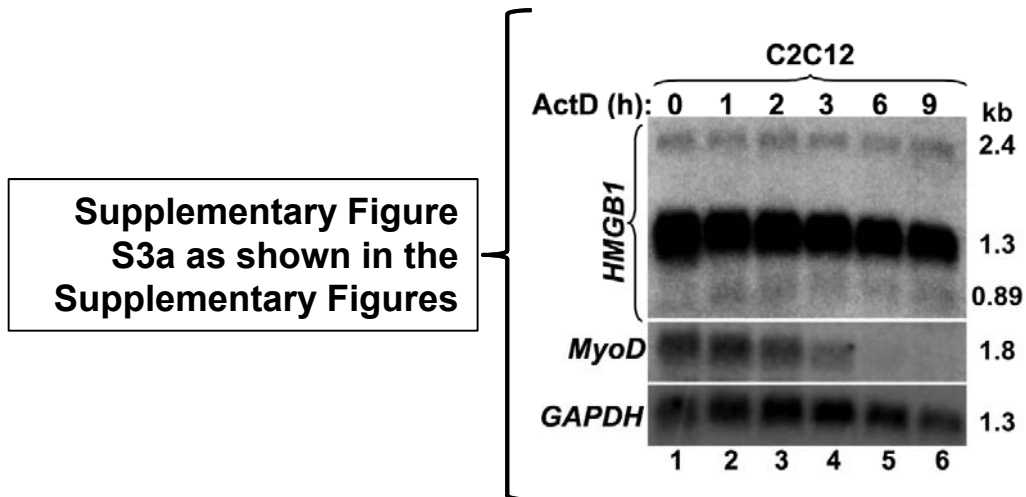

Scans of the original blots shown in Supplementary Figure S3a

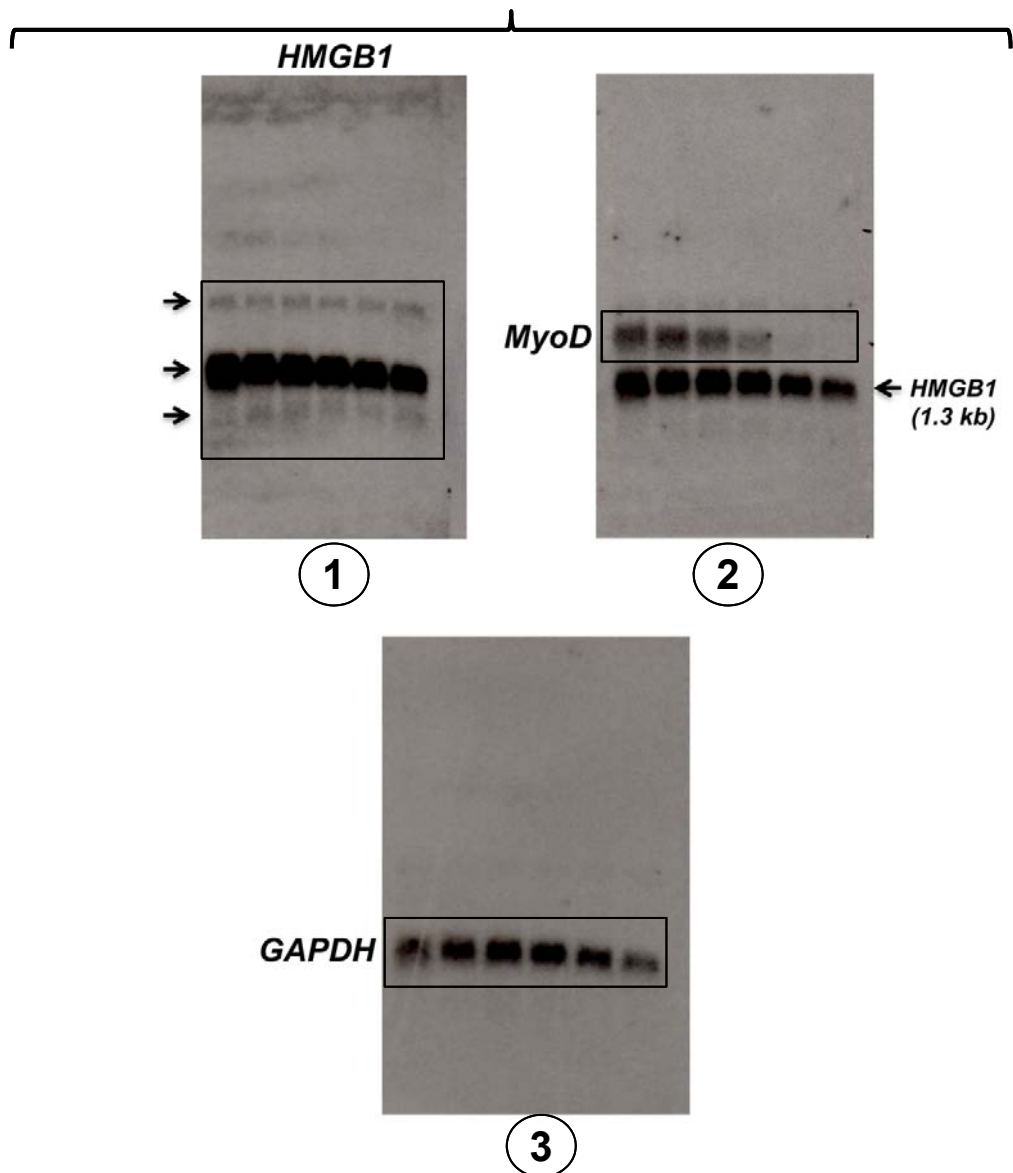

The same membrane was probed first with an anti-sense probe specific for *HMGB1* mRNA (1), then with anti-sense probe specific for *MyoD* (2). The blot was then probed with an anti-sense probe specific for *GAPDH* (3). The boxes highlight the area of the blots that were used to mount Supplementary Figure S3a.

## Supplementary Figure S12t

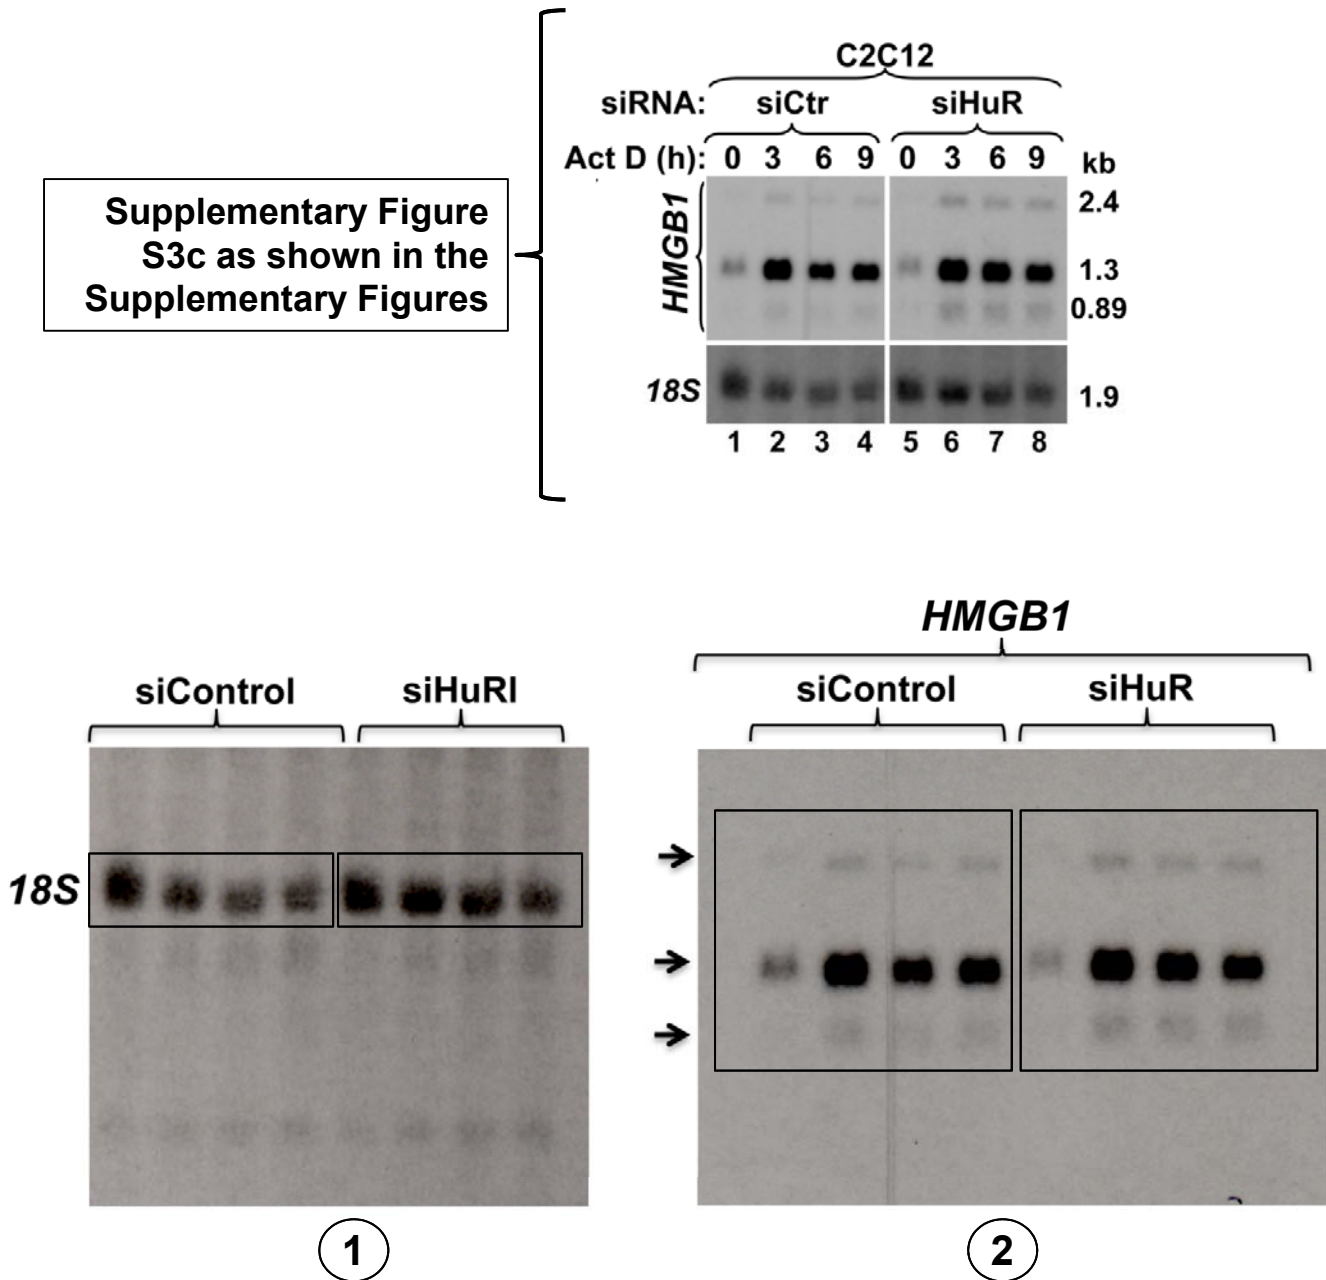

The same membrane was probed first with an anti-sense probe specific for *HMGB1 mRNA* (2), the membrane was then stripped and probed with anti-sense probe specific for *18S RNA* (1). The boxes highlight the area of the blots that were used to mount Supplementary Figure S3c.



## Supplementary Figure S12u

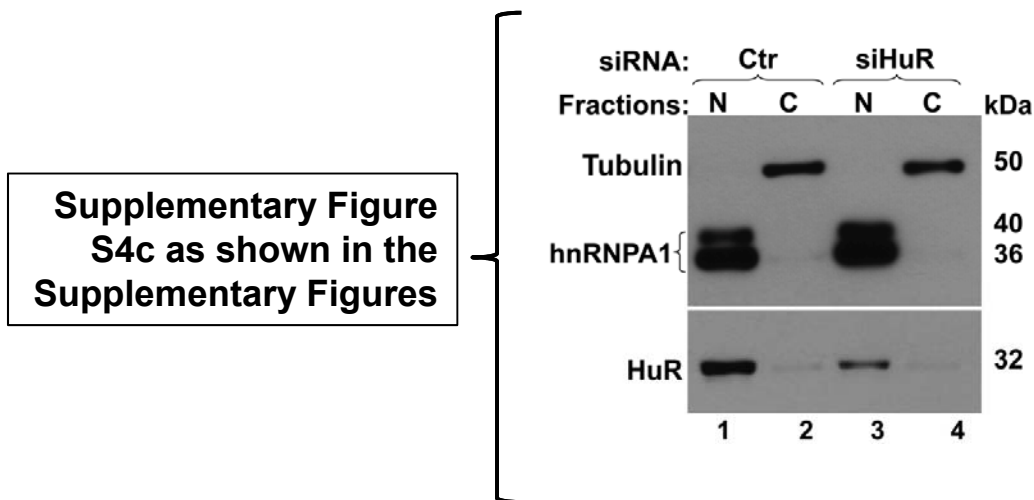

Scans of the original blots shown in Supplementary Figure S4c

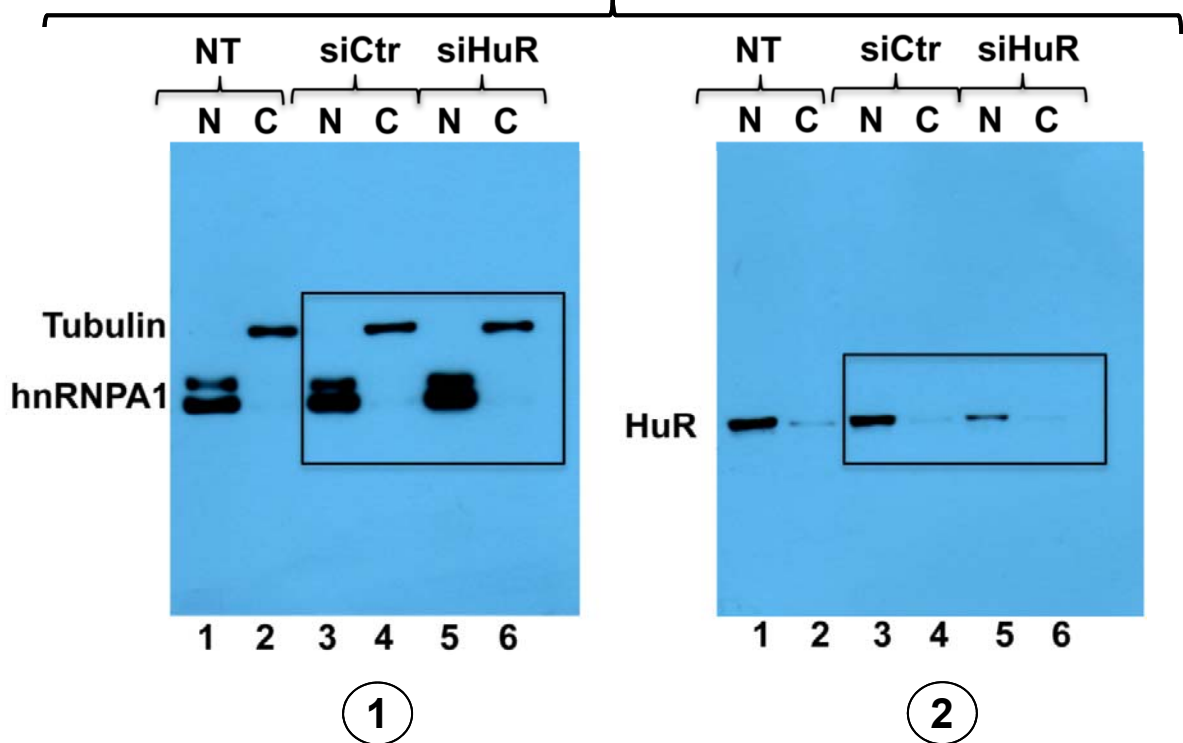

The two scans represent the same membrane that was first probed with the anti-HuR antibody (2). The membrane was then stripped and probed with both anti-Tubulin and anti-hnRNPA1 antibodies (1). Only lanes 3 to 6 of the gel are shown in Supplementary Figure S4c. Lanes 1-2 show Tubulin, hRNPA1 and HuR in Nuclear and Cytoplasmic fraction in cells not treated with siRNAs. These two lanes were not shown in Supplementary Figure S4c. The boxes highlight the area of the blots that were used to mount Supplementary Figure S4c

# Supplementary Figure S12v

Supplementary Figure S4d as shown in the Supplementary Figures

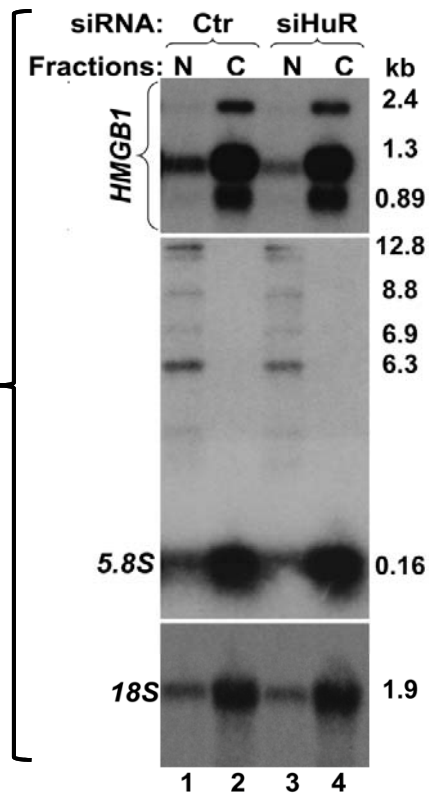

Scans of the original blots shown in Supplementary Figure S4d

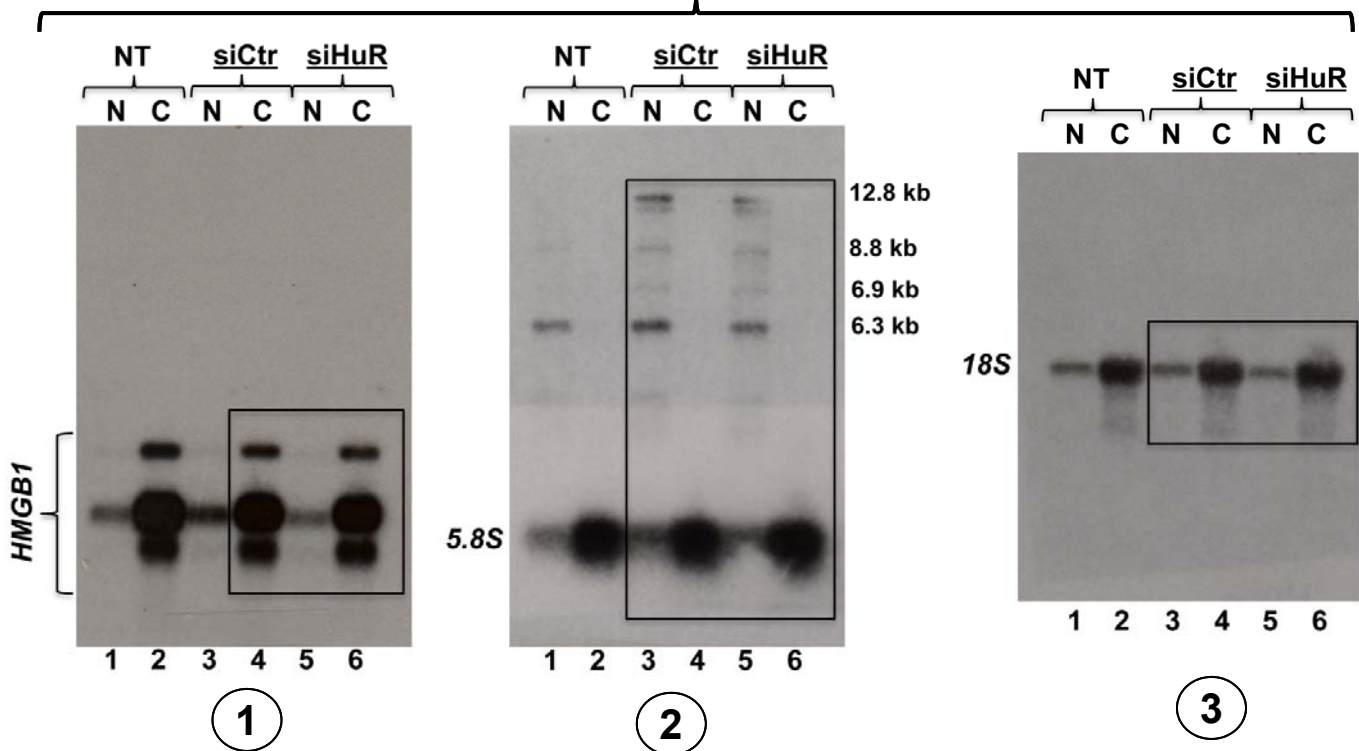

The scans represent the same membrane that was probed with different anti-sense probes. The membrane was first probed with an anti-sense probe specific for *HMGB1 mRNA* (1), then it was stripped and probed with anti-sense probe specific for the 5.8S RNA and its precursors (2). The membrane was then stripped again and probed with an anti-sense probe specific for the 18S RNA (3). Only lanes 3 to 6 of the gel are shown in Supplementary Figure S4d. Lanes 1-2 show 18S (3), 5.8S and its precursors (2) and HMGB1 (1) RNAs in the Nuclear and Cytoplasmic fractions in cells not treated with siRNAs. Lanes 1 and 2 were not shown in Figure Supplementary Figure S4d. The boxes highlight the area of the blots that were used to mount Supplementary Figure S4d.

# Supplementary Figure S12w

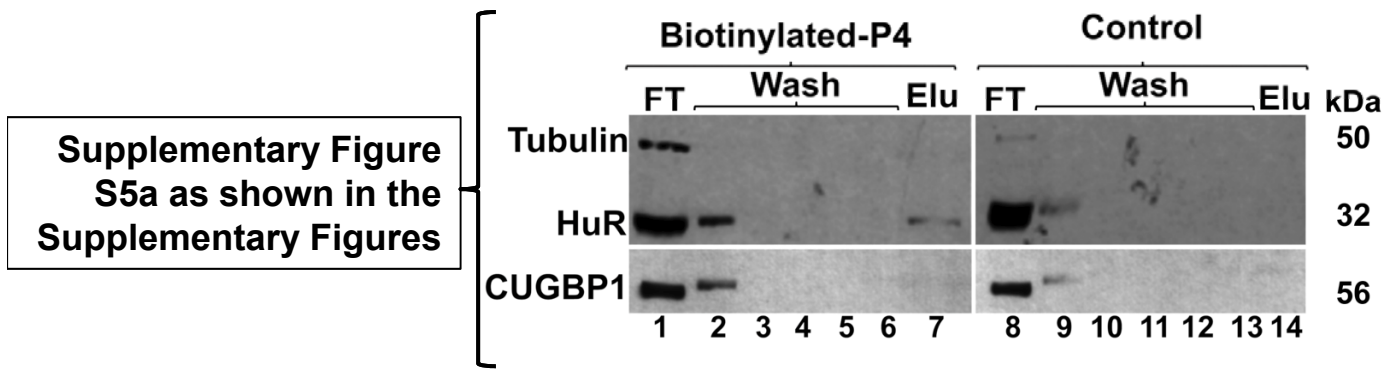

Scans of the original blots shown in Supplementary Figure S5a

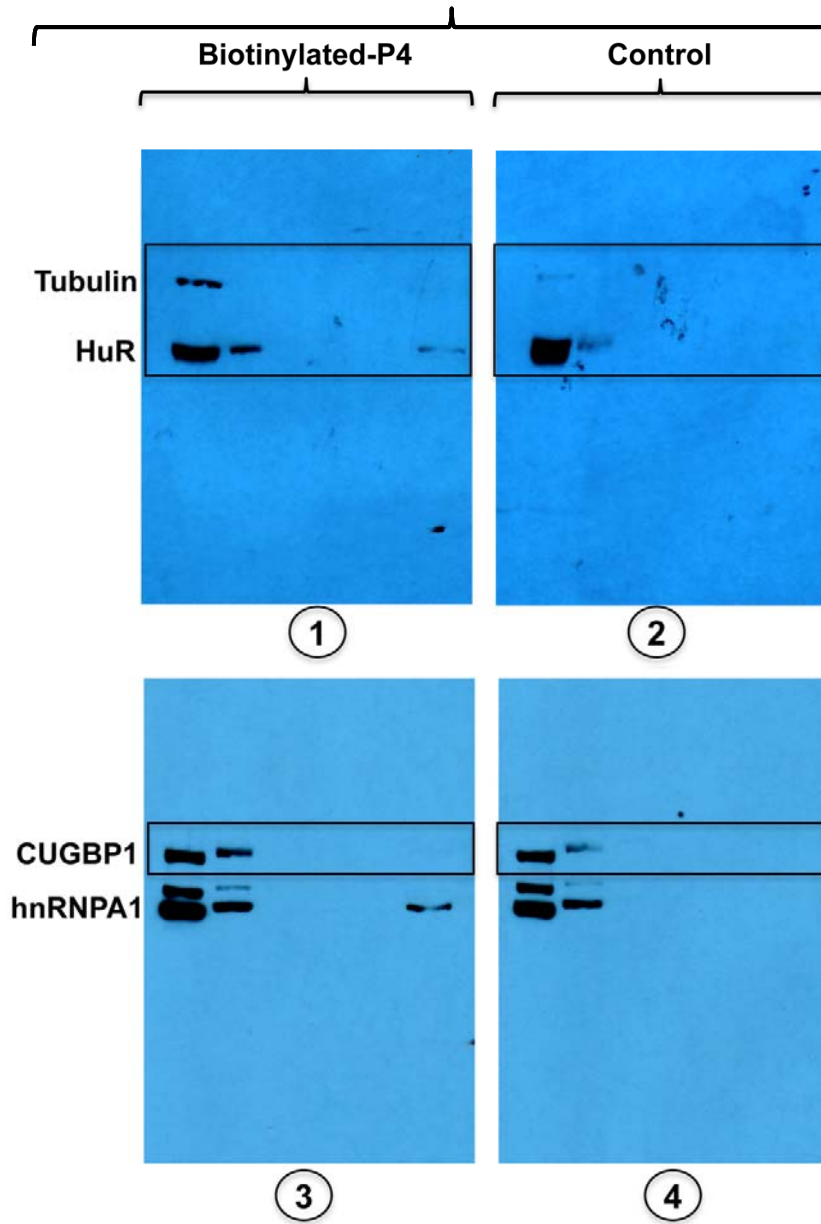

Scans (1) and (3) represent the membrane of the same biotinylated-P4 pull-down experiment that was first probed with both anti-HuR and anti-Tubulin antibodies (1), then stripped and probed with both anti-CUGBP1 and anti-hnRNP A1 antibodies (3). The control experiments (2 and 4) was run on a separate gel and the membrane was respectively probed as described for (1) and (3). The hnRNP A1 was used as a positive control but was not included in the final Supplementary Figure S5a. The boxes highlight the area of each blot used to mount Supplementary Figure S5a.

## Supplementary Figure S12x

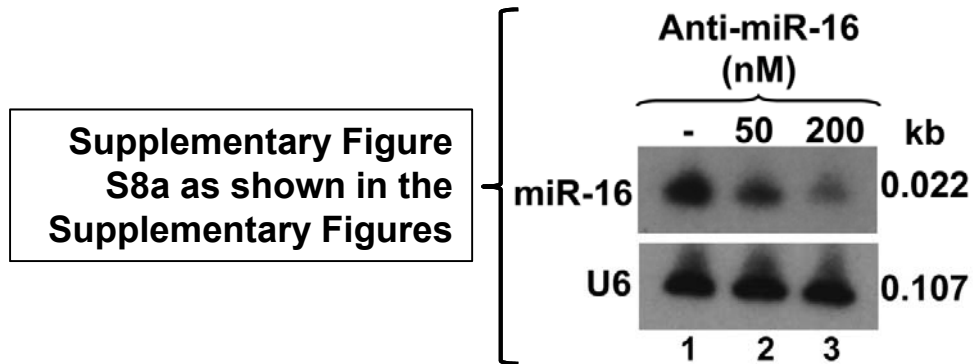

Scans of the original blots shown in Supplementary Figure S8a

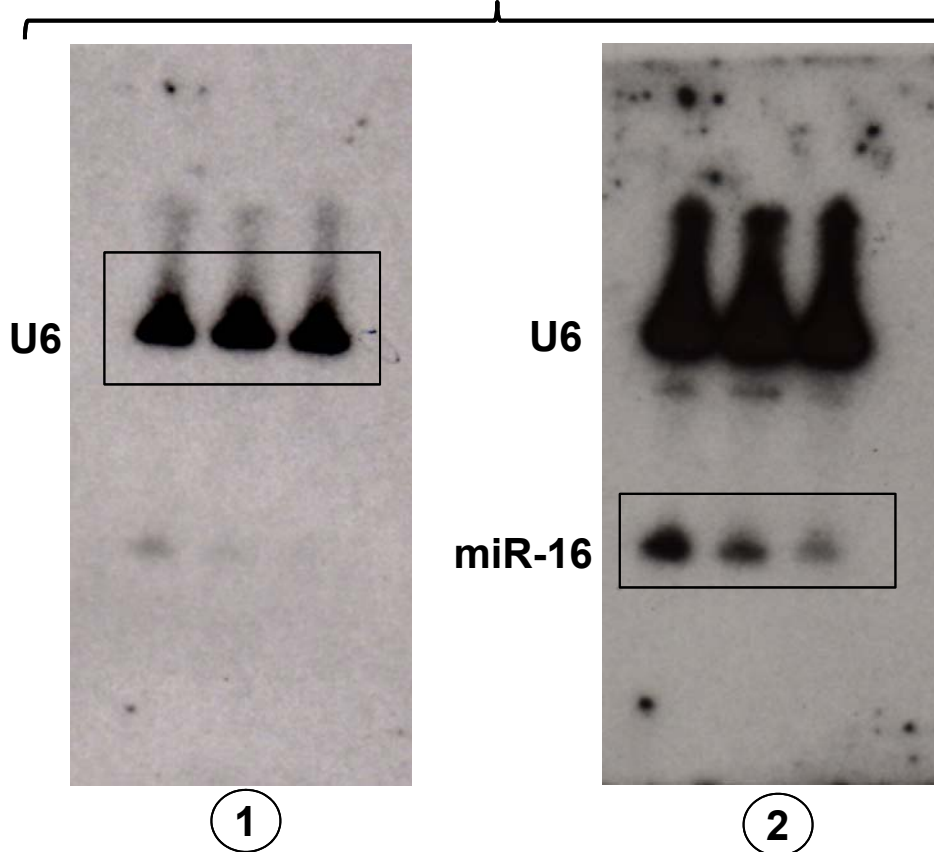

The scans represent the same membrane that was probed with anti-sense probes specific for *U6* RNA and miR-16. Scans (1) and (2) represent two different exposures of this membrane. Since *U6* RNA is highly abundant in the cell, we chose the lower exposure of this blot (1) to show a non-saturated signal of *U6* RNA. The boxes highlight the area of the blots that were used to mount Supplementary Figure S8a.

## Supplementary Figure S12y

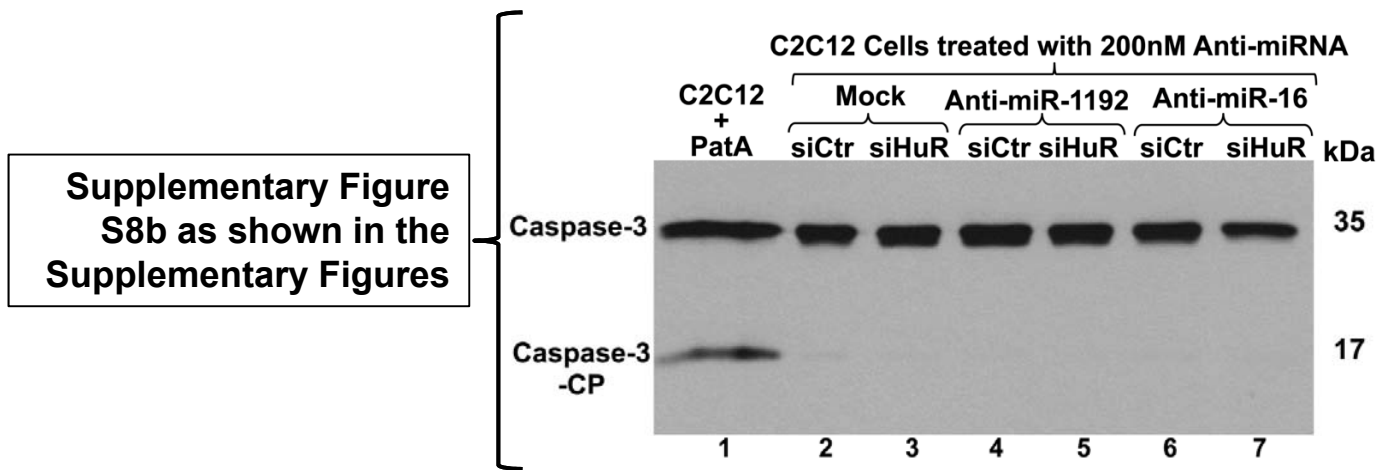

Scan of the original blots shown in Supplementary Figure S8b

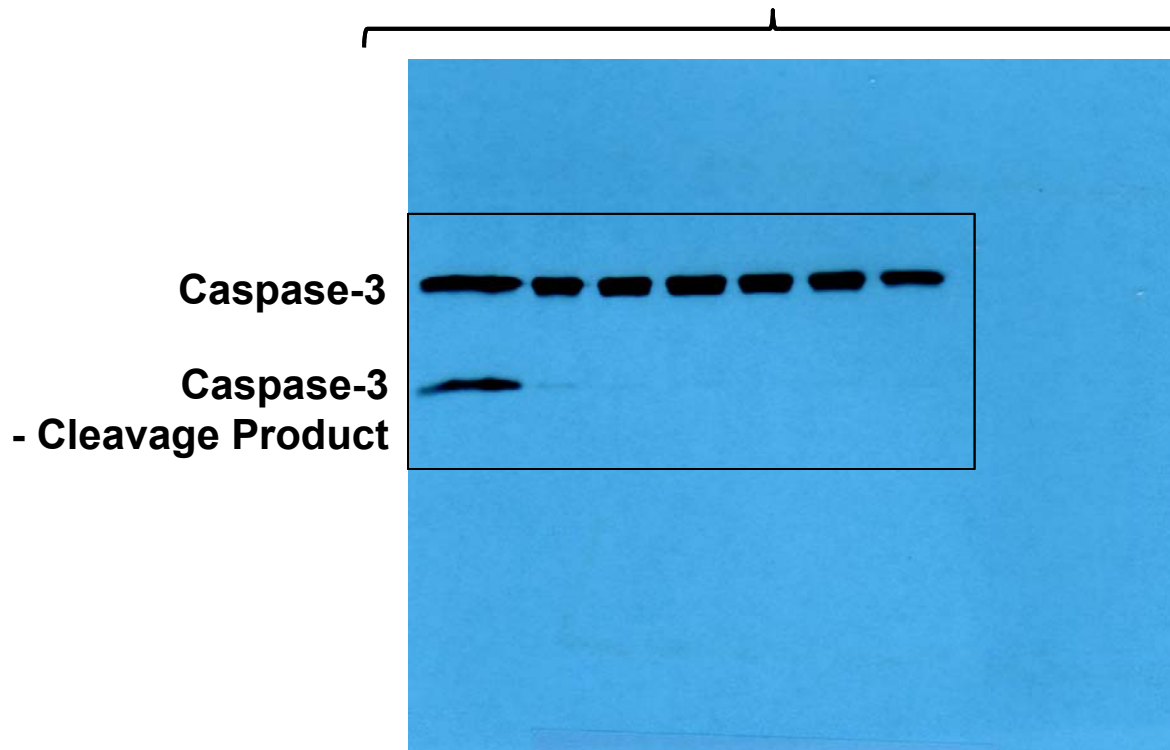

The scan represents the membrane that was probed with the anti-caspase-3 antibody that recognizes both the non-cleaved and cleaved isoform of caspase-3. The box highlights the area of the blot that was used to mount Supplementary Figure S8b.

# Supplementary Figure S12z

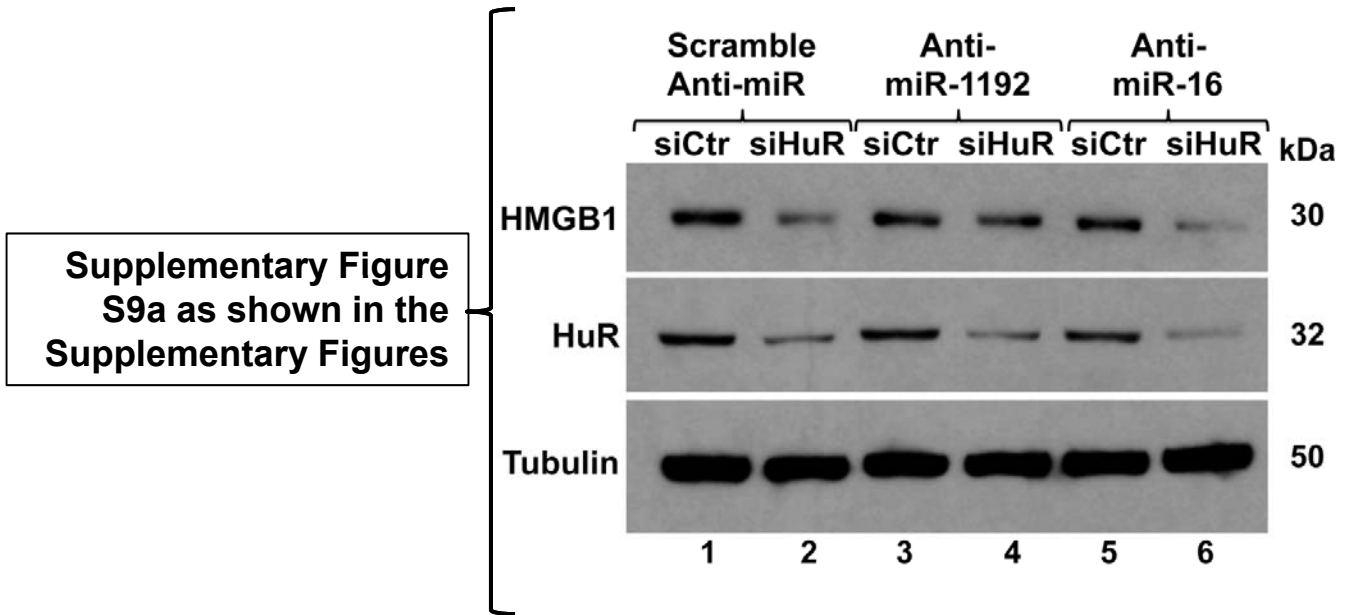

Scans of the original blots shown in Supplementary Figure S9a

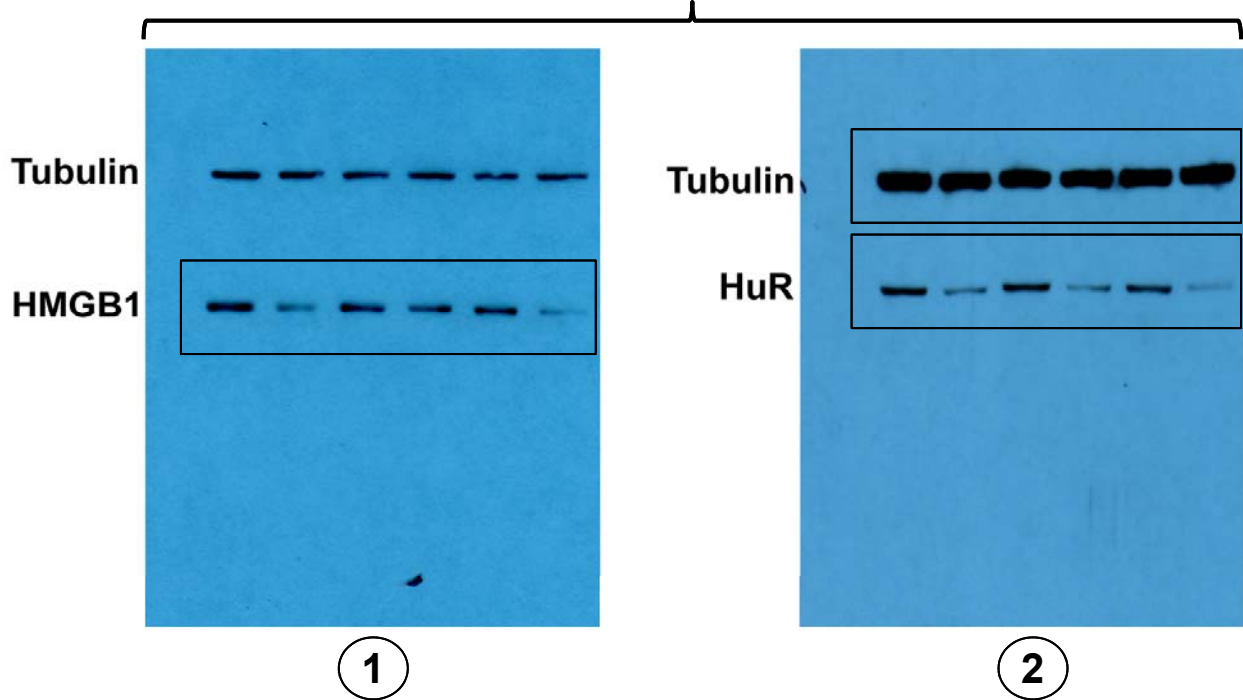

The two scans shown represent two different gels that were run using the same samples from the same experiment. Scan (1) represents the blot that was probed with both anti-HMGB1 and anti-Tubulin antibodies. Scan (2) represents a blot that was probed with both the anti-Tubulin and anti-HuR. The boxes highlight the area of each blot used to mount Supplementary Figure S9a.

## Supplementary Figure S12za

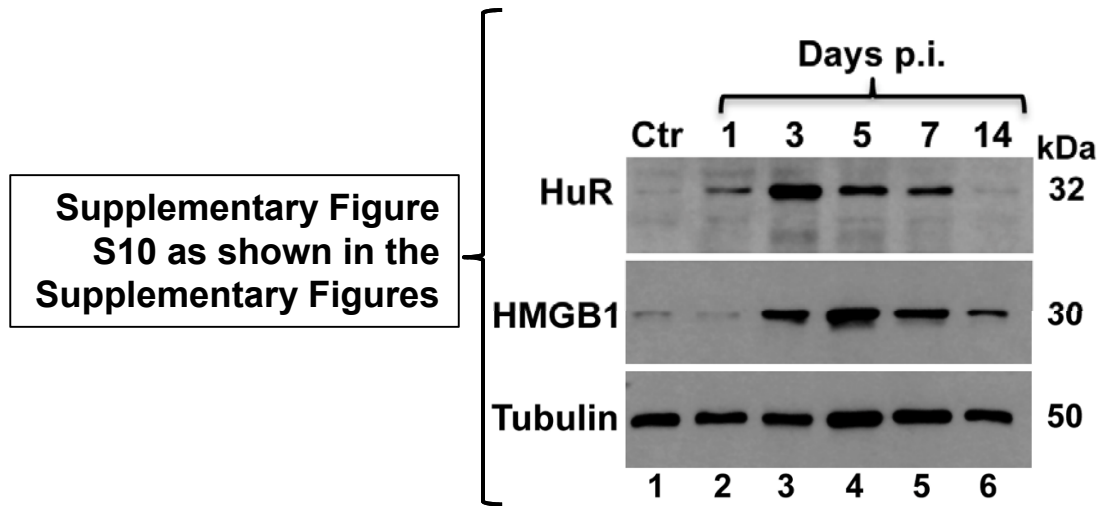

Scans of the original blots shown in Supplementary Figure S10

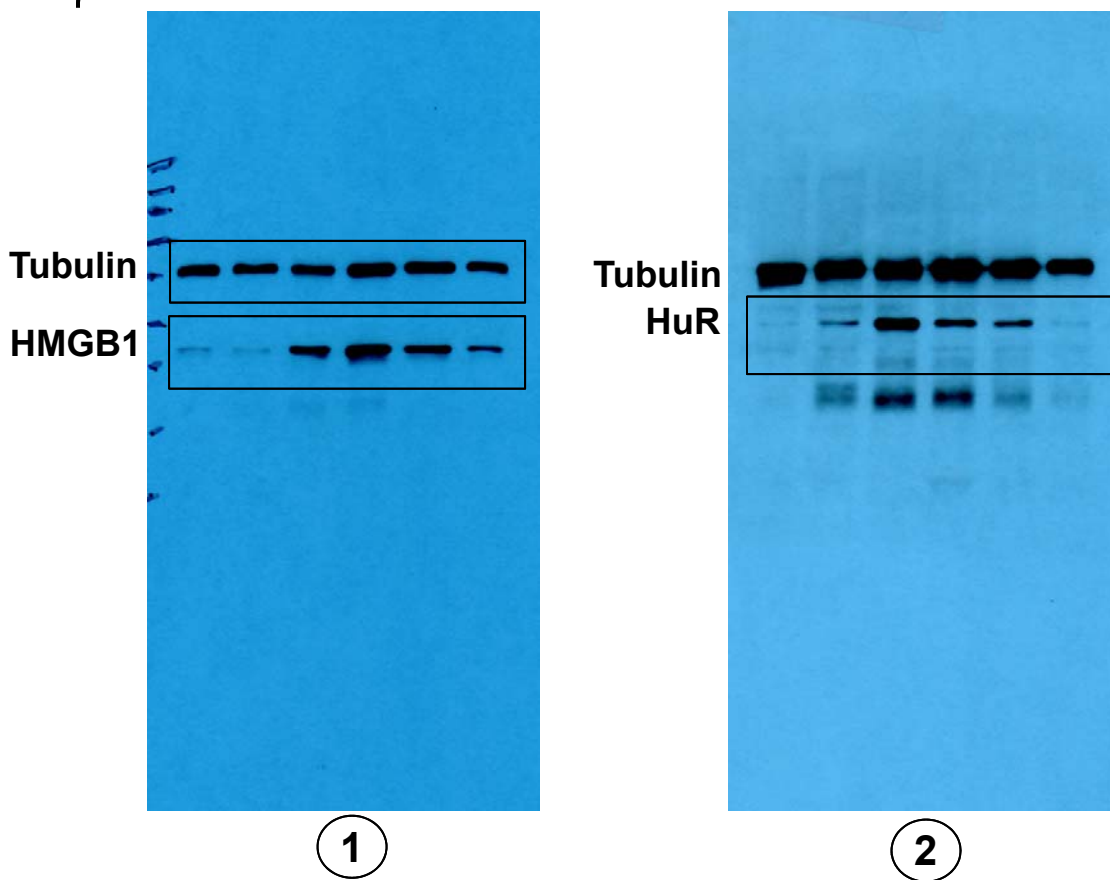

The two scans shown represent two different gels that were run using the same samples from the same experiment. Scan (1) represents the blot that was probed with both anti-HMGB1 and anti-Tubulin antibodies. Scan (2) represents a blot that was probed with both the anti-Tubulin and anti-HuR. The boxes highlight the area of each blot used to mount Supplementary Figure S10.

## Supplementary Table S1

| HuR mRNA targets in undifferentiated C2C12 cells |            |               |                                                                                                                     |
|--------------------------------------------------|------------|---------------|---------------------------------------------------------------------------------------------------------------------|
|                                                  | zratio Exp | Gene Symbol   | Gene Name                                                                                                           |
| 1                                                | 8.86       | Actb          | actin, beta, cytoplasmic                                                                                            |
| 2                                                | 8.25       | Acta2         | Mus musculus actin, alpha 2, smooth muscle, aorta (Acta2), mRNA                                                     |
| 3                                                | 8.22       | Ccnh          | cyclin H                                                                                                            |
| 4                                                | 7.95       | Fbxl5         | f-box and leucine-rich repeat protein 5                                                                             |
| 5                                                | 7.25       | Heyl          | hairy/enhancer-of-split related with YRPW motif-like                                                                |
| 6                                                | 7.00       | Phip          | pleckstrin homology domain interacting protein                                                                      |
| 7                                                | 6.89       | Crtap         | cartilage associated protein                                                                                        |
| 8                                                | 6.85       | Fgf10         | fibroblast growth factor 10                                                                                         |
| 9                                                | 6.71       | Adnp          | activity-dependent neuroprotective protein                                                                          |
| 10                                               | 6.64       | Ext2          | exostoses (multiple) 2                                                                                              |
| 11                                               | 6.60       | Rbm3          | RNA binding motif protein 3                                                                                         |
| 12                                               | 6.38       | Pcbp2         | poly(rC) binding protein 2                                                                                          |
| 13                                               | 6.24       | Actg          | actin, gamma, cytoplasmic                                                                                           |
| 14                                               | 6.22       | Gspt1         | G1 to phase transition 1                                                                                            |
| 15                                               | 6.02       | Hmgb1         | high mobility group box 1                                                                                           |
| 16                                               | 5.91       | Hunk          | hormonally upregulated Neu-associated kinase                                                                        |
| 17                                               | 5.90       | Dnaja1        | DnaJ (Hsp40) homolog, subfamily A, member 1                                                                         |
| 18                                               | 5.89       | Ywhaz         | tyrosine 3-monooxygenase/tryptophan 5-monooxygenase activation protein, zeta polypeptide                            |
| 19                                               | 5.81       | Ccnf          | cyclin F                                                                                                            |
| 20                                               | 5.77       | Ube2l3        | ubiquitin-conjugating enzyme E2L 3                                                                                  |
| 21                                               | 5.72       | Ptp4a1        | protein tyrosine phosphatase 4a1                                                                                    |
| 22                                               | 5.42       | Plcd          | phospholipase C, delta                                                                                              |
| 23                                               | 5.41       | Slc15a2       | solute carrier family 15 (H <sup>+</sup> /peptide transporter), member 2                                            |
| 24                                               | 5.29       | Fnbp3         | formin binding protein 3                                                                                            |
| 25                                               | 5.06       | Peli1         | pellino 1                                                                                                           |
| 26                                               | 5.05       | Ap3d          | adaptor-related protein complex AP-3, delta subunit                                                                 |
| 27                                               | 4.95       | Hba-a1        | hemoglobin alpha, adult chain 1                                                                                     |
| 28                                               | 4.91       | Tmem2         | transmembrane protein 2                                                                                             |
| 29                                               | 4.63       | Ncoa6         | nuclear receptor coactivator 6                                                                                      |
| 30                                               | 4.55       | no value      | Mus musculus, Similar to expressed in activated T/LAK lymphocytes, clone MGC:6819 IMAGE:2648849, mRNA, complete cds |
| 31                                               | 4.54       | no value      | Mus musculus, clone IMAGE:4949762, mRNA, partial cds                                                                |
| 32                                               | 4.36       | Acadl         | acetyl-Coenzyme A dehydrogenase, long-chain                                                                         |
| 33                                               | 4.35       | Set           | SET translocation                                                                                                   |
| 34                                               | 4.31       | Gsr           | glutathione reductase 1                                                                                             |
| 35                                               | 4.24       | catp          | cation-transporting atpase                                                                                          |
| 36                                               | 4.21       | Cai           | calcium binding protein, intestinal                                                                                 |
| 37                                               | 3.91       | LOC55933      | putative lysophosphatidic acid acyltransferase                                                                      |
| 38                                               | 3.86       | Rpia          | ribose 5-phosphate isomerase A                                                                                      |
| 39                                               | 3.85       | Cd81          | CD 81 antigen                                                                                                       |
| 40                                               | 3.72       | Syngn1        | synaptogyrin 1                                                                                                      |
| 41                                               | 3.63       | no value      | Mus musculus, Similar to hypothetical protein FLJ20085, clone MGC:29315 IMAGE:5008342, mRNA, complete cds           |
| 42                                               | 3.32       | Eplin-pending |                                                                                                                     |
| 43                                               | 3.28       | Dnm2          | dynamitin 2                                                                                                         |
| 44                                               | 3.09       | Ptbp1         | polypyrimidine tract binding protein 1                                                                              |
| 45                                               | 3.08       | Dnajc7        | DnaJ (Hsp40) homolog, subfamily C, member 7                                                                         |
| 46                                               | 3.07       | Gss           | glutathione synthetase                                                                                              |
| 47                                               | 3.04       | Ptma          | prothymosin alpha                                                                                                   |
| 48                                               | 2.89       | Rpl13a        | ribosomal protein L13a                                                                                              |
| 49                                               | 2.71       | Dlgh1         | discs, large homolog 1 (Drosophila)                                                                                 |
| 50                                               | 2.70       | Hmgb3         | high mobility group box 3                                                                                           |
| 51                                               | 2.68       | Mbnl          | muscleblind-like (Drosophila)                                                                                       |
| 52                                               | 2.66       | 37501         | septin 2                                                                                                            |
| 53                                               | 2.62       | Ccni          | cyclin I                                                                                                            |
| 54                                               | 2.61       | Cd9           | CD9 antigen                                                                                                         |
| 55                                               | 2.59       | Klf5          | Kruppel-like factor 5                                                                                               |
| 56                                               | 2.43       | no value      | Mus musculus, Similar to hypothetical protein FLJ20257, clone MGC:28888 IMAGE:4911622, mRNA, complete cds           |
| 57                                               | 2.34       | no value      | Mus musculus, clone IMAGE:3964267, mRNA                                                                             |
| 58                                               | 2.33       | Rce1          | Ras and a-factor-converting enzyme 1 homolog (S. cerevisiae)                                                        |
| 59                                               | 2.27       | Ranbp1        | RAN binding protein 1                                                                                               |
| 60                                               | 2.21       | Sdccag1       | serologically defined colon cancer antigen 1                                                                        |
| 61                                               | 2.21       | Pdhx          | pyruvate dehydrogenase complex, component X                                                                         |
| 62                                               | 2.19       | Foxp1         | forkhead box P1                                                                                                     |
| 63                                               | 2.13       | Csnk2b        | casein kinase II, beta subunit                                                                                      |
| 64                                               | 2.13       | Mzf22         | KRAB zinc finger protein (Mzf22)                                                                                    |

HuR was immunoprecipitated from exponentially growing C2C12 cells using a monoclonal anti-HuR antibody, or an IgG control antibody. RNAs extracted from these immunoprecipitates were then processed and analyzed on cDNA array chips, which contain 17,000 probe sets of known and unknown expressed sequence tags as described in the Supplemental Material and Methods section. A default external background setting was used in conjunction with a gene-based background signal threshold to determine gene signal significance. A message was considered as an HuR target only if the difference in abundance after HuR- and IgG-IP was greater than or equal to two-fold. Therefore, mRNAs listed in this table represent the immunoprecipitated messages with a z ratio (HuR-IP/IgG-IP) over 2 in two independent experiments.



**Supplementary Table S2:** *List of microRNAs that associate with HuR protein in C2C12 muscle cells.*

| <b>microRNA associated with HuR</b>                          | <b>Signal HuR-IP/IgG-IP</b> |
|--------------------------------------------------------------|-----------------------------|
| <a href="#">mmu-miR-184</a>                                  | 18.0                        |
| <a href="#">mmu-miR-1192</a>                                 | 4.9                         |
| <a href="#">mmu-miR-467e*</a>                                | 4.7                         |
| <a href="#">mmu-miR-882</a>                                  | 3.3                         |
| <a href="#">mmu-miR-709</a>                                  | 3.1                         |
| <a href="#">mmu-miR-691</a>                                  | 3.1                         |
| <a href="#">mmu-miR-138*</a>                                 | 2.7                         |
| <a href="#">mmu-miR-875-3p</a>                               | 2.7                         |
| <a href="#">mmu-miR-466f-3p</a>                              | 2.6                         |
| <a href="#">mmu-miR-883a-5p</a>                              | 2.5                         |
| <a href="#">mmu-miR-720</a>                                  | 2.3                         |
| <a href="#">mmu-miR-669f</a>                                 | 2.3                         |
| <a href="#">mmu-miR-551b</a>                                 | 2.3                         |
| <a href="#">mmu-miR-710</a>                                  | 2.3                         |
| <a href="#">mmu-miR-711</a>                                  | 2.3                         |
| <a href="#">mmu-miR-467g</a>                                 | 2.2                         |
| <a href="#">mmu-miR-300*</a>                                 | 2.2                         |
| <a href="#">mmu-miR-770-3p</a>                               | 2.1                         |
| <a href="#">mmu-miR-297a*/mmu-miR-297b-3p/mmum-miR-297c*</a> | 2.1                         |
| <a href="#">mmu-miR-467f</a>                                 | 2.1                         |

Microarray analysis of immunoprecipitation experiment using the anti-HuR antibody and cell extracts from C2C12 muscle cells. The analysis was carried out by EXIQON (USA). The list of 20 miRNAs that were immunoprecipitated with the anti-HuR antibody were selected based on a 2-fold-or-greater increase in their signal when compared to the list of miRNAs that immunoprecipitate with the control anti-IgG antibody.

**Supplementary Table S3: Sequencing of miR-1192 from muscle cells both in vitro and in vivo.**

**a**

| miR      | Clone # | C2C12 myoblasts                                                                                       |
|----------|---------|-------------------------------------------------------------------------------------------------------|
| miR-1192 | 1       | AAACAAACAAACAGACCAAUU                                                                                 |
|          | 2       | AAACAAACAAACAGACCAAUU                                                                                 |
|          | 3       | AAACAAACAAACAGACCAAUU                                                                                 |
|          | 4       | AAACAAACAAACAGACCAAUU                                                                                 |
|          | 5       | GGAACGAT - ACAGAGAAGATTAGC                                                                            |
|          | 6       | GGAACGAT - ACAGAGAAGATTAGC                                                                            |
|          | 7       | GGAACGAT - ACAGAGAAGATTAGC                                                                            |
|          | 8       | AAACAAACAAACAGACCAAUU                                                                                 |
|          | 9       | AAACAAACAAACAGACCAAUU                                                                                 |
|          | 10      | AAACAAACAAACAGACCAAUU                                                                                 |
|          | 11      | AAACAAACAAACAGACCAAUU                                                                                 |
|          | 12      | AAACAAACAAACAGACCAAUU                                                                                 |
|          | 13      | AAACAAACAAACAGACCAAUU                                                                                 |
|          | 14      | AAACAAACAAACAGACCAAUU                                                                                 |
|          | 15      | AAACAAACAAACAGACCAAUU                                                                                 |
| U6       | 1       | GCTTCGGCAGCACATATACTAAAATTGGAACGATACAGAGAAGATTAGCATGGCCCCTGCG<br>CAAGGATGACACGCAAATTCGTGAAGCGTTCCATAT |
|          | 2       | GCTTCGGCAGCACATATACTAAAATTGGAACGATACAGAGAAGATTAGCATGGCCCCTGCG<br>CAAGGATGACACGCAAATTCGTGAAGCGTTCCATAT |
|          | 3       | GCTTCGGCAGCACATATACTAAAATTGGAACGATACAGAGAAGATTAGCATGGCCCCTGCG<br>CAAGGATGACACGCAAATTCGTGAAGCGTTCCATAT |
|          | 4       | GCTTCGGCAGCACATATACTAAAATTGGAACGATACAGAGAAGATTAGCATGGCCCCTGCG<br>CAAGGATGACACGCAAATTCGTGAAGCGTTCCATAT |
|          | 5       | GCTTCGGCAGCACATATACTAAAATTGGAACGATACAGAGAAGATTAGCATGGCCCCTGCG<br>CAAGGATGACACGCAAATTCGTGAAGCGTTCCATAT |

**b**

| miR      | Clone # | Mouse muscle                                                                                          |
|----------|---------|-------------------------------------------------------------------------------------------------------|
| miR-1192 | 1       | AAACAAACAAACAGACCAAUU                                                                                 |
|          | 2       | AAACAAACAAACAGACCAAUU                                                                                 |
|          | 3       | AAACAAACAAACAGACCAAUU                                                                                 |
|          | 4       | AAACAAACAAACAGACCAAUU                                                                                 |
|          | 5       | AAACAAACAAACAGACCAAUU                                                                                 |
|          | 6       | AAACAAACAAACAGACCAAUU                                                                                 |
|          | 7       | AAACAAACAAACAGACCAAUU                                                                                 |
|          | 8       | AAACAAACAAACAGACCAAUU                                                                                 |
|          | 9       | AAACAAACAAACAGACCAAUU                                                                                 |
| U6       | 1       | GCTTCGGCAGCACATATACTAAAATTGGAACGATACAGAGAAGATTAGCATGGCCCCT<br>GCGCAAGGATGACACGCAAATTCGTGAAGCGTTCCATAT |

Total RNA extracts prepared from **(a)** C2C12 cells or **(b)** a gastrocnemius muscle isolated from a C57BL/6 mouse was reverse transcribed using the Universal cDNA synthesis kit (Exiqon). The resulting cDNA was then used in a PCR reaction containing Taq polymerase and primers specific for miR-1192 or U6 as a control. The resulting PCR product was cloned into the T-easy vector (Promega) and transformed in DH5 $\alpha$  bacterial cells. Plasmid DNA was isolated from bacterial colonies and sequenced using a T7 specific primer. The obtained sequences from these colonies are shown in the tables.

**Supplementary Table S4:** Primers used to prepare probes for gel shift experiments. \_

| Probes         | Sequences                                                                                                       |
|----------------|-----------------------------------------------------------------------------------------------------------------|
| 5'UTR          | - For: 5'-TAA TAC GAC TCA CTA TAG GGC ACA GCC ATT GCA GTA CAT-3'<br>- Rev: 5'- TCC TTT GCC CAT GTT TAG TTG A-3' |
| Probe 1 (P1)   | - For: 5'-TAATACGACTCACTATAGGGTTGGTTCTAGCGCAGTTTTT-3'<br>- Rev: 5'-CACAGCCGAGGCACAGAGTC-3'                      |
| Probe 2 (P2)   | - For: 5'-TAATACGACTCACTATAGGGGCTGTGTAAGAATTGTTTT-3'<br>- Rev: 5'-TGAAAATACCACCAGGACAGG-3'                      |
| Probe 3 (P3)   | - For: 5'-TAATACGACTCACTATAGGGGCCACTAACCTTGCCCTGGTA-3'<br>- Rev: 5'-TCCCATATATAACTAATTTGTGCTG-3'                |
| Probe 4 (P4)   | - For: 5'-TAATACGACTCACTATAGGGTGGGGACAGTAGTTTGGTT TTT-3'<br>- Rev: 5'-TCGTATAAGCTGCATCAGAGACA-3'                |
| Probe 5 (P5)   | - For: 5'-TAATACGACTCACTATAGGGTCTGATGCAGCTTATACGAAGA-3'<br>- Rev: 5'-TCAGACCTATGAAAAGGACAACA-3'                 |
| Probe 6 (P6)   | - For: 5'-TAATACGACTCACTATAGGGTTCTTCTCGAGGGGAAGCTA-3'<br>- Rev: 5'-TGGATGAAAATGTTACCCTACCA-3'                   |
| Probe 7 (P7)   | - For: TAATACGACTCACTATAGGGTGGTAGGGTAACATTTTCATCCA<br>- Rev: 5'-CCTTCAAGGACAGACGTTTCAG-3'                       |
| Probe 8 (P8)   | - For: 5'-TAATACGACTCACTATAGGGCCTTGAAGGACTGATGGAAAA-3'<br>- Rev: 5'-GCTCACACTTTTGGGGATACA-3'                    |
| Probe 9 (P9)   | - For: 5'-TAATACGACTCACTATAGGGATCCCCAAAAGTGTGAGCTT-3'<br>- Rev: 5'-CAAGTTTCTGAGCAATCCA-3'                       |
| Probe 10 (P10) | - For: 5'-TAATACGACTCACTATAGGGTGGATTGCTCAGGAAACTTG-3'<br>- Rev: 5'-GCAAATGTATTGGACAAATGG-3'                     |
| Probe 11 (P11) | - For: TAATACGACTCACTATAGGGTTGTCCAATACATTTGCTTTTTC<br>- Rev: CACAAAAGCGCGTGAAATTA                               |
| Probe 12 (P12) | - For: TAATACGACTCACTATAGGGTCACGCGCTTTTGTGATG<br>- Rev: AAAACCTCTGTAATTATTAGTTTATTAGTATCATCCAG                  |

All the probes used for the gel-shift assays described in Figure 4B were synthesized by RT-PCR using the full-length HMGB1 cDNA (NCBI, NM\_010439) with the primers outlined above.
